## The dynamics of motor learning through the formation of internal models

Camilla Pierella<sup>1,2,3,4\*</sup>, Maura Casadio<sup>2</sup>, Sara A. Solla<sup>3,5</sup>, Ferdinando A. Mussa-Ivaldi<sup>3,4,6</sup>

1 <sup>1</sup> Center for Neuroprosthetics and Institute of Bioengineering, School of Engineering, École Polytechnique

2 Fédérale de Lausanne (EPFL), Geneva, Switzerland

3 <sup>2</sup> Department of Informatics, Bioengineering, Robotics and Systems Engineering, University of Genoa,

4 Genoa, Italy

5 <sup>3</sup> Department of Physiology, Northwestern University, Chicago, IL, USA

6 <sup>4</sup> Shirley Ryan Ability Lab, Chicago, IL, USA

7 <sup>5</sup> Department of Physics and Astronomy, Northwestern University, Evanston, IL, USA

8 <sup>6</sup> Department of Biomedical Engineering, Northwestern University, Evanston, IL, USA

9

10

11 \* Corresponding author

12 E-mail: [camilla.pierella@epfl.ch](mailto:camilla.pierella@epfl.ch) (CP)

## 13 **Abstract**

14 A medical student learning to perform a laparoscopic procedure as well as a recently paralyzed user of a  
15 powered wheelchair must learn to operate machinery via interfaces that translate their actions into  
16 commands for the external device. Mathematically, we describe this type of learning as a deterministic  
17 dynamical process, whose state is the evolving forward and inverse internal models of the interface. The  
18 forward model predicts the outcomes of actions while the inverse model generates actions designed to  
19 attain desired outcomes. Both the mathematical analysis of learning dynamics and the performance  
20 observed in a group of subjects demonstrate first-order exponential convergence of the learning process  
21 toward a particular state that depends only on the initial inverse and forward models and on the supplied  
22 sequence of targets. Noise is not only present but necessary for the convergence of learning through the  
23 minimization of the difference between actual and predicted outcomes.

## 24 **Author summary**

25 Several studies have suggested that as we learn a new skill our brain forms representations, or “internal  
26 models”, of the skill and of the environment in which we operate. Theories of motor learning postulate that  
27 the brain builds forward models that predict the sensory consequences of motor commands, and inverse  
28 models that generate successful commands from planned movements. We test this hypothesis taking  
29 advantage of a special interface that generates a novel relation between the subject’s actions and the  
30 position of a cursor on a computer monitor, thus allowing subjects to control an external device by  
31 movements of their body. We recorded the motions of the body and of the cursor, and obtained estimates of  
32 both forward and inverse models. We followed how these estimates evolved in time as subjects practiced  
33 and acquired a new skill. We found that the description of learning as a simple deterministic process driven  
34 by the sequence of targets is sufficient to capture the observed convergence to a single solution of the  
35 inverse model among an infinite variety of alternative possibilities. This work is relevant to the study of  
36 fundamental learning mechanisms as well as to the design of intelligent interfaces for people with paralysis.

## 37 **Introduction**

38 A distinct feature of the neuromotor system is the large number of muscles and degrees of freedom

39 allowing it to attain a specific motor goal in a number of different ways [1]. This is both a resource and a  
40 computational challenge: while this motor redundancy provides the brain with a multitude of options, an  
41 enabling feature of motor dexterity, it also results in a family of ill-posed problems characterized by a lack  
42 of uniqueness in their solutions [2, 3]. Here, we consider the challenge posed by redundancy from the  
43 perspective of learning. How does the central nervous system learn to perform a novel task when multiple  
44 alternative solutions are available? This question acquires clinical relevance when a person suffering from  
45 loss of limb or some form of paralysis must reorganize the still available mobility to recover quality of life  
46 and independence through the operation of assistive devices – such as wheelchairs or robotic assistants –  
47 and dedicated human-machine interfaces.

48 In the last two decades, studies of motor learning [4-8] have established that the adaptation of limb  
49 movements to external perturbing forces takes place through the gradual formation of an internal  
50 representation, or "internal model" of these forces. To be predictable, the forces cannot be random  
51 disturbances, but must have a deterministic structure expressed in relation to the motion of the body and to  
52 the brain's commands[6-9]. Donchin and Shadmehr [10] and others [11-13] have proposed to represent the  
53 development of such an internal model as the evolution of a dynamical system.

54 Internal models are of two types: forward and inverse. Forward models owe their name to their predictive  
55 representation of the process that transforms action commands into their sensory consequences. Inverse  
56 models reverse the direction of this process by deriving action commands from desired sensory outcomes.  
57 Earlier theoretical work by Jordan and Rumelhart [14] considered how the learning of actions can be  
58 viewed as the concurrent learning of forward and inverse models of actions. Here, we extend this approach  
59 to the learning of a novel map established by a body machine interface (BoMI) that translates movements  
60 of the upper body (shoulders and arm) into movements of an external object that users must guide to a set  
61 of target locations. This is an assistive tool for people that have lost the use of their hands after injury to the  
62 cervical spinal cord. We investigate how unimpaired subjects become skilled at controlling the external  
63 object via the BoMI. Our findings reveal that learning proceeds through the concurrent evolution of  
64 coupled forward and inverse models of the body-to-object mapping established by the BoMI. The validity  
65 of this description is tested by comparing the predicted evolution of motor performance with the learning  
66 performance observed in a group of human subjects. We compared the forward and inverse models derived

67 from simulated learning dynamics with forward and inverse models estimated from motion data at different  
68 stages of learning.

## 69 **Results**

### 70 **A model of learning while practicing control via a body-machine interface**

71 We investigated how users of a body machine interface learn to reorganize or "remap" their body motions  
72 as they practice controlling an external object through the BoMI. The controlled object could be a  
73 wheelchair, a robotic assistant, or a drone [15-17]. Here we focus on the control of a computer cursor  
74 whose two-dimensional coordinates determine its location on a computer screen. Effectiveness in cursor  
75 control is the first and most common benchmark for brain-based interfaces [18-20], as the ability to control  
76 two-dimensional position is readily applied to a variety of tasks (e.g., an action performed via a joystick,  
77 entering computer text, etc.). We consider interfaces in which a linear mapping associates the body motion  
78 signals to the coordinates of the external object. Importantly, there is an imbalance between the  
79 dimensionality of the task space and that of the body signals, the latter being larger. Thus, any position of  
80 the controlled object corresponds to many (potentially infinite) different body configuration signals. The  
81 BoMI matrix  $H$  establishes a linear map between these two spaces;  $H$  has as many rows  $K$  as signals are  
82 needed to control the external object, and as many columns  $S$  as there are body signals. Not being square,  
83 the matrix  $H$  does not have a unique inverse. But there exist infinite "right inverses" that combined with  $H$   
84 yield the  $K \times K$  identity matrix in the task space of external control signals. Each such right inverse  
85 transforms a desired position of the controlled object in one particular set of values for the body signals.  
86 We consider users to be competent when they are able to move successfully their body in response to a  
87 presented target for the controlled object. Mathematically, we consider this as finding one right inverse  $G$   
88 of the mapping  $H$ , out of a multitude of possible and equally valid choices. Current theories and  
89 experimental observations [10] suggest that learning is a dynamical process in which the learners modify  
90 their behavior based on the errors observed at each iteration of a task. In the kinematically redundant  
91 conditions considered here, learning is problematic because a given low-dimensional task error signal has  
92 multiple representations in the high-dimensional body space. Therefore, we considered an error surface  
93 defined by the squared task error in the space of the elements of the target-to-body map  $G$  adopted by a

94 learner, where  $G$  is the learner's inverse model of the body-to-cursor mapping  $H$  established by the BoMI.  
95 We implemented our learning model based on the hypothesis that the learners update the map  $G$  by moving  
96 along this error surface, following the line of steepest descent determined by the gradient of the squared  
97 error with respect to the elements of  $G$ . This error gradient depends on several variables; some can be  
98 directly observed by the learner, such as the error made in attempting to reach a given target position of the  
99 external device. However, the error gradient also depends upon the elements of the interface map  $H$ , which  
100 the learner cannot be assumed to know. Therefore, gradient descent learning of the inverse model requires a  
101 concurrent learning of the forward model. The latter requires a different error surface, since the forward  
102 map relates body motions to the consequent motion of the controlled object. Forward model learning does  
103 not require a target position for the controlled object, as the relevant error in this case is the difference  
104 between predicted and observed position of the controlled object. The squared prediction error defines an  
105 error surface in the space of the elements of the estimated forward map  $\hat{H}$ .

106 Learning is thus described through two first order dynamical processes determined by two state equations.  
107 A forward learning process:

$$108 \quad \hat{H}^{(n+1)} = \hat{H}^{(n)} + \varepsilon(p^{(n)} - \hat{H}^{(n)}q^{(n)})q^{T(n)} \quad (1)$$

109 and an inverse learning process

$$110 \quad G^{(n+1)} = G^{(n)} - \eta \hat{H}^{(n)T} e^{(n)} u^{T(n)} \quad (2)$$

111 For details on the derivation of these equations, see Methods. The forward and inverse models are  
112 effectively the states of the respective processes, and the  $n$ -th iteration of the learning process results in  
113 state variables  $\hat{H}^{(n)}$  and  $G^{(n)}$ .

114 Equation (1) updates the subject's estimate  $\hat{H}$  of the forward model  $H$  that transforms  $S$ -dimensional body  
115 configurations  $q$  into  $K$ -dimensional positions  $p$  of the controlled object. The term in parentheses is the  
116 prediction error between actual and predicted positions of the controlled object. The concurrent process  
117 described by Equation (2) is the learning of the inverse model  $G$  that the subjects use to map the target  
118 object position  $u^{(n)}$  onto body signals. The reaching error  $e^{(n)} = (p^{(n)} - u^{(n)})$  that guides this process is the  
119 difference between actual and desired positions of the controlled object. Two possibly different learning  
120 rates,  $\varepsilon$  and  $\eta$ , provide inverse time constants for the respective dynamical processes.

121 Since we focus on the case in which forward and inverse learning are carried out concurrently, naïve users  
122 are immediately presented with the reaching task, and as they practice they observe both the reaching error  
123 and the prediction error. Equations (1) and (2) are coupled through  $\hat{H}^{(n)}$  and through a third equation that  
124 describes the body signals currently adopted to reach the target position:

$$125 \quad q^{(n)} = G^{(n)}u^{(n)} \quad (3)$$

126 This apparently innocuous interaction has potentially harmful effects on the convergence of the coupled  
127 dynamics, as the second term in the gradient contribution to Equation (1) includes a quadratic factor in  $q^{(n)}$   
128 and thus in  $G^{(n)}$ . This contribution may result in local minima, a problem avoided by adding noise to  
129 Equation (3).

130 We validated our approach with six healthy subjects that learned to control the two-dimensional movement  
131 of a cursor on a monitor using eight signals from their upper body motions (shoulders and upper arms on  
132 both sides). In these experiments,  $S=8$  and  $K=2$ , and the state space of the combined forward-inverse  
133 learning was  $2 \times 16 = 32$ - dimensional.

### 134 **Dynamics of learning in human subjects**

135 We monitored the learning process through two scalar metrics: RE, the L2 norm of the reaching error (the  
136 difference between actual and target location of the cursor at the end of the reaching movement), and IME,  
137 the spectral norm of the inverse model error (the difference between the identity matrix and the product  
138 between the interface map  $H$  and the current estimate  $G^{(n)}$  of the inverse model). The spectral norm of a  
139 matrix, indicated here by  $\|\cdot\|$  to emphasize its analogy with the L2 norm of a vector, is the maximum  
140 singular value of the matrix. We estimated  $G^{(n)}$  from target and body signal data by least squares fit on  
141 Equation (3). The elements of  $G^{(n)}$  were estimated using data from 12 trials: trial  $n$  and its 11 preceding  
142 trials. Overlapping moving windows that included 12 trials were shifted by one trial at each iteration.

143 In the experiment, each subject practiced with a personalized body-to-cursor map derived from the statistics  
144 of its own freely produced upper body motions (see calibration procedure in Methods). With increasing  
145 number of practice trials, their RE decreased to values closer to the target radius (1 cm, Fig 1a). The  
146 learning process took over one hundred steps ( $172 \pm 32$  trials, mean  $\pm$  SEM) before reaching asymptotic  
147 performance (Fig 1), identified as the time when the norm of the reaching error was smaller than the radius  
148 of the target. Similarly, the matrix  $G^{(n)}$  converged to a generalized inverse of the body-to-cursor map (Fig

149 1b). Although the subjects explored a number of different body configurations while learning how to  
 150 control the cursor, in the end they found a stable movement pattern and built a representation of the inverse  
 151 model  $G$ . Note the asymptotically small variations in the acquired  $G$ , with  $\|\Delta G\|$  about 10% of  $\|G\|$  (Fig 2).  
 152 For each subject, both RE and IME errors decreased with time following a trend captured by an exponential  
 153 curve (Equation (21)). The corresponding learning rates, given by the inverse of the time constant of the  
 154 exponential fits, are shown in Table 1 for each subject. Note the great similarity of these two rates for any  
 155 given subject.

**Fig 1. Subjects learn to use the body-machine interface.** Data for the six subjects enrolled in the study (S1- S6).  
 (a) Temporal evolution of the norm RE of the reaching error calculated over a moving window that includes the  
 current and the 11 preceding trials. (b) Temporal evolution of the norm IME of the inverse model error. This  
 includes the calculation of the inverse model  $G^{(n)}$ ; the latter was obtained by least squares fit on Equation (3) from  
 target and body signal data for trial  $n$  and the 11 trials preceding it.

156

**Fig 2. Temporal evolution of the changes in the inverse map  $G^{(n)}$ .** Changes in the inverse map as a function of  
 trial number  $n$ , quantified by  $\|\Delta G^{(n)}\| = \|G^{(n)} - G^{(n-1)}\|/\|G^{(n)}\|$  (see Equation (18) in Methods), for the six  
 subjects enrolled in the study (S1-S6).

157

**Table 1.** Exponential rate used to best approximate the decay of RE ( $\lambda^{RE}$ ) and IME ( $\lambda^{IME}$ ) with  $n$ , respectively.  
 The  $R^2$  values quantify the goodness-of-fit of the exponential model for each subject to the corresponding  
 experimental data.

| Subject | RE             |            | IME             |             |
|---------|----------------|------------|-----------------|-------------|
|         | $\lambda^{RE}$ | $R_{RE}^2$ | $\lambda^{IME}$ | $R_{IME}^2$ |
| S 1     | 0.036±0.003    | 0.87       | 0.036±0.004     | 0.78        |
| S 2     | 0.010±0.001    | 0.85       | 0.006±0.001     | 0.86        |
| S 3     | 0.015±0.003    | 0.73       | 0.014±0.003     | 0.75        |
| S 4     | 0.016±0.003    | 0.80       | 0.022±0.004     | 0.80        |
| S 5     | 0.021±0.001    | 0.87       | 0.020±0.002     | 0.86        |
| S 6     | 0.029±0.002    | 0.93       | 0.029±0.002     | 0.90        |

158

159 **Learning dynamics: model vs. human subjects**

160 To build a model for each subject, we used the subject-specific map  $H$  and the subject-specific sequence of  
161 targets used for training. The learning rate  $\eta$  for the inverse model (Equation (2)) was taken to be equal to  
162 the subject-specific rates  $\lambda_{RE}$  reported in Table 1 (see Methods). The learning rate  $\varepsilon$  for the estimation of  
163 the forward model (Equation (1)), and the amplitude  $\sigma$  of the noise added to the inference of body motions  
164 (Equation (3)) followed from an optimization procedure (see Methods). Table 2 reports the values of these  
165 three parameters for each subject. We let the model evolve until the norm of the reaching error was smaller  
166 than 1 cm, as the subject's performance reached a plateau when the cursor reached the target.  
167 We then tested how well our model captured the learning dynamics of each subject. As shown in Fig 3,  
168 these subject specific models were able to predict quite well the individual learning curves. Both the RE  
169 and the IME estimated from the model follow the time evolution extracted from the real experimental data.  
170 Correlation coefficients (Table 3) quantify the similarity between the simulated and actual temporal  
171 evolution of RE and IME during learning.

**Fig 3. Modeling human learning.** (a) Temporal evolution of the norm RE of the reaching error as a function of trial number  $n$ , calculated from the data of six subjects (black) and from the respective models (blue). (b) Temporal evolution of the norm IME of the inverse model error as a function of trial number  $n$ , estimated from the experimental data (black) and from the model simulation (blue). Both metrics are calculated over a moving window that encompasses trial  $n$  and its preceding 11 trials.

172

**Table 2.** Subject-specific model parameters. The learning rates  $\eta$  and  $\varepsilon$  correspond to the inverse and the forward model, respectively;  $\sigma$  is the amplitude of the Gaussian noise added to the inference of target-specific body motions.

| Subject | $\sigma$ | $\varepsilon$ | $\eta$ |
|---------|----------|---------------|--------|
| S 1     | 0.7335   | 0.1774        | 0.036  |
| S 2     | 0.6587   | 0.2463        | 0.010  |
| S 3     | 0.7395   | 0.1924        | 0.015  |
| S 4     | 0.7241   | 0.2178        | 0.016  |
| S 5     | 0.8278   | 0.1540        | 0.021  |
| S 6     | 0.7794   | 0.1937        | 0.029  |



**Table 3.** Correlation coefficients ( $R^2$ ) between the temporal evolutions of the norm RE of the reaching error and the norm IME of the inverse model error recorded during the experiment, and the temporal evolution of these two scalar error metrics as predicted by the model.

| Subject | Correlation RE | Correlation IME |
|---------|----------------|-----------------|
| S 1     | 0.93           | 0.87            |
| S 2     | 0.90           | 0.90            |
| S 3     | 0.78           | 0.78            |
| S 4     | 0.77           | 0.70            |
| S 5     | 0.98           | 0.97            |
| S 6     | 0.89           | 0.83            |

173

174 The model also allows us to compute a current estimate of the forward map  $\hat{H}$  as acquired by the subjects  
175 while practicing. We quantified the similarity between the estimated  $\hat{H}^{(n)}$  and the BoMI map  $H$  at each  
176 iteration of the learning dynamics by using the forward model error (FME), defined as the spectral norm of  
177 the difference between  $H$  and  $\hat{H}^{(n)}$ , normalized by the spectral norm of  $H$  (see Equation (19) in Methods).  
178 This error in the estimate of the map that transforms body movements into cursor movement was  
179 responsible for the cursor prediction error, the difference between the actual and the expected position of  
180 the cursor. We monitored the norm PE of the prediction error and the FME as a function of trial number  $n$   
181 (Fig 4). The estimate  $\hat{H}^{(n)}$  converged toward the actual forward map  $H$ , resulting in near zero asymptotic  
182 values for both PE and FME (Fig 4).

**Fig 4. Subjects learn the forward model.** (a) Temporal evolution of the norm PE of the prediction error as a function of trial number  $n$ . (b) Temporal evolution of the estimate of the forward map, quantified by FME =  $\|\hat{H}^{(n)} - H\|/\|H\|$ , as a function of trial number  $n$ . Data are shown for each subject-specific model. Only the first 100 iterations of the dynamics are presented, since the asymptotic regime has by then been reached for both metrics.

183

184 The dynamics of the learning model captured the errors in the low-dimensional task space of the controlled  
185 cursor as well as the history of body signals generated by the subjects in response to the successive targets  
186 (Fig 5 and Table 4); the sole exception was Subject 4, whose accuracy in reaching the target position was  
187 smaller and characterized by a higher level of variability (Fig 3a). The body and cursor signals recorded  
188 during the experiment and predicted by the model were not very similar at the beginning of training, but  
189 they quickly converged and tended to overlap by the time RE and IME reached their asymptotic condition  
190 (Fig 5, Table 4). These results support the conclusion that a model of learning based on simple gradient  
191 descent over quadratic error surfaces captures the formation of forward and inverse representations of the

192 map established by the body-machine interface.

**Fig 5. Reconstruction of body and cursor signals.** Comparison between real (black) and simulated (blue) data for subject 6. The top panel presents the values of the eight body signals  $\{q_1, \dots, q_8\}$ , i.e., the (x,y) coordinates of four markers (shoulders and upper arms on both sides) in the image plane of the associated cameras; the bottom panel shows the (x, y) coordinates of the cursor  $\{p_1, p_2\}$  in the reference frame of the computer monitor.

193

**Table 4.** Correlation coefficients ( $R^2$ ) between the temporal evolution of the body signals  $\{q_1, \dots, q_8\}$  and the cursor coordinates  $\{p_1, p_2\}$  recorded during the experiment, and the temporal evolution of these quantities as predicted by the model. The comparison was performed during the last 100 trials.

| Subject | Body space | Cursor space |
|---------|------------|--------------|
| S 1     | 0.90       | 0.96         |
| S 2     | 0.90       | 0.97         |
| S 3     | 0.93       | 0.98         |
| S 4     | 0.69       | 0.93         |
| S 5     | 0.91       | 0.98         |
| S 6     | 0.93       | 0.99         |

194

## 195 Discussion

196 We investigated the learning process that occurs when subjects reorganize or "remap" their body motions  
197 as they learn to perform a task that involves a novel relation between body motions and their observable  
198 consequences. For a patient who suffers from severe paralysis and is obliged to reorganize the available  
199 mobility to operate an assistive device such as a powered wheelchair through a human-machine interface,  
200 the ability to engage in such remapping becomes a necessity of life. Here we investigated the process of  
201 learning to perform reaching movements via a body-machine interface; we used a group of unimpaired  
202 subjects under the preliminary assumption that similar learning mechanisms are present in people suffering  
203 from injuries to the spinal cord. We considered a body-machine interface that harnesses signals generated  
204 by body motions in order to control an external object, in this case the position of a cursor on a computer  
205 monitor. The interface establishes a many-to-one body-to-object map that the user must learn to master  
206 starting from a naïve state. The map is in fact not intuitive, as there is no obvious correspondence between  
207 the motions of the body and the motion of the controlled object.

208 In our experiment, unimpaired subjects practiced controlling a computer cursor through a BoMI whose  
209 linear body-to-object map was customized to each subject through a calibration procedure that fitted the  
210 statistics of the subject's body motions. Through practice with a fixed BoMI, all subjects demonstrated

211 exponential convergence toward an inverse of the BoMI mapping, with subject-specific learning rates. The  
212 parameters of this inverse model define a state space in which learning is modeled as a first order  
213 dynamical process that evolves based on the specific sequence of target positions for the external object,  
214 and of two types of error: (i) the prediction error that is the difference between the actual position of the  
215 object and the position predicted by the subjects based on their internal representation of the interface map,  
216 and (ii) the task error or reaching error that is the difference between the position reached by the object and  
217 the actual target position. While the prediction error depends on the current estimate of the forward model,  
218 the reaching error depends on the current state of the inverse model, which determines the chosen body  
219 motion.

220 We studied the evolution of the learning system using different interface maps  $H$ , learning rates  $\eta$ , and  
221 target sequences  $U$  for each subject. The empirical observations of human adaptation to the BoMI were  
222 compared to predictions from a subject-specific learning model that used initial conditions inferred from  
223 each subject's initial performance, the same  $H$  and  $U$  as used by the subject, and a learning rate  $\eta$  obtained  
224 by temporal regression of the experimental data. We demonstrated that a model based on first-order  
225 dynamics was sufficient to capture the evolution of learning as described both through the observed errors  
226 and through the accuracy of the estimated internal models. There was however a notable difference  
227 between the models' and the subjects' learning: the decay of the norm of the reaching error computed from  
228 real data was not as smooth as the decay predicted by the model. This might be due to the main  
229 simplifications adopted in our model, namely, i) the learning dynamics (Equations (1) and (2)) were  
230 assumed to be deterministic, without any noise contributing to the state and output equations, and ii) the  
231 learning of the inverse model (Equation (2)) was assumed to be linear.

232 Although the interface forward map is linear (Methods, Equation (4)), it is a many-to-one map admitting a  
233 multitude of inverses. This “redundancy” opens the possibility of successful linear and nonlinear inverse  
234 maps. Redundancy also leads to an important consideration about gradient descent learning. The reaching  
235 error surface in the space of the inverse model elements does not have a unique minimum but a  
236 continuously connected set of minima corresponding to the null space of the forward map. In the metaphor  
237 of a skier descending from a mountain following the gradient, this space of equivalent inverse models  
238 corresponds to a flat elongated valley at the bottom of the mountain. Anywhere along the valley is a valid

239 end to the ride, as it corresponds to a valid inverse model. The inverse model on which the steepest descent  
240 ends depends on the initial conditions, as predicted by the dynamical model (Fig 3b – evolution of the norm  
241 of the inverse model error).

242 The analysis of learning dynamics of the users of a body-machine interface is essential for the effective  
243 development of coadaptive approaches, where the interface parameters are themselves updated based on  
244 the user's state of learning [21-23]. Coadaptation requires a seamless integration between machine learning  
245 and human learning. Both learning processes are dynamic, evolving as functions of their own internal state  
246 and of inputs that reflect the state of their counterpart. A mismatch between the timing of the interface  
247 updates relative to the subject's learning dynamics would likely lead to hindering human learning (if the  
248 interface update rate is too fast) or to ineffectiveness (if the interface update rate is too slow).

249 In our current understanding, motor learning is not only a way to acquire or improve a skill, but is perhaps  
250 most importantly a biological mechanism to gain knowledge about the physical properties of the  
251 environment [9]. Through the practice of movements, the brain learns to separate unpredictable from  
252 predictable features of the world in which the body is immersed; through the formation of representations  
253 or "internal models" of the predictable features, the brain acquires the ability to anticipate the sensory  
254 consequences of its commands. The human operator of a BoMI must develop an inverse model of the  
255 forward map to transform a desired goal into an action of the body. Further evidence from the literature  
256 indicates that adaptive, error-driven, internal model formation is a general feature of motor learning,  
257 observed during arm reaching and drawing, and during pointing with the legs and walking [24].

258 Theoretical studies of motor learning have focused on control policies and internal models to understand  
259 how the brain generates action commands [25]. Control policies allow the brain to select goals and plan  
260 actions, while internal models generate motor commands that are appropriate for those plans in the context  
261 established by sensory feedback. For example, when the goal is to reach a target, the brain must first  
262 evaluate the current position of the limb with respect to the target and use a control policy to plan a  
263 movement of the hand [3, 26]. An internal model of limb's dynamics, called an inverse model, then  
264 converts that plan into motor commands [27-29], while a forward model of the same limb's dynamics  
265 predicts the sensory consequences of these motor commands [14, 30, 31]. The comparison of this  
266 prediction with actual sensory feedback [32] allows re-estimating the current hand position with respect to

267 the target and updating the motor plan [33] by issuing an error-dependent motor command aimed at  
268 correcting the ongoing movement. Forward and inverse internal models thus play a fundamental role in  
269 movement planning and execution.

270 Recent studies have considered the formation of these internal models as dynamical process [10, 34, 35].  
271 For example, to account for findings observed when reaching arm movements are perturbed by external  
272 force fields, Donchin and co-workers [10] argued that the forces generated by the subjects to compensate  
273 for the external field are the output of an internal model of the field, developed through experience. Their  
274 theory, successful at predicting the time history of adaptation, was based on two key assumptions that we  
275 also adopted here, namely i) that the movement outcomes and the ensuing errors result from a deterministic  
276 process, and ii) that the internal model is the state of learning.

277 The transformation from the movements of the BoMI user to the movements of the controlled objects  
278 establishes a new geometrical relation between body motions and their consequences. The BoMI thus  
279 essentially creates a novel geometry that the user must learn to operate. Here, we have implemented a linear  
280 transformation from body signals to a cursor, which allowed us to work under the assumption that the users  
281 would develop a linear inverse model of this map. However, linearity of the inverse map is not a necessary  
282 consequence of operating through a linear forward map, because a linear forward map that is not bijective  
283 may also admit nonlinear inverses. Therefore, our approach will not result in the most general solution to  
284 the problem of finding an inverse map. Nevertheless, our analysis demonstrated that the linear inverse  
285 model derived by coupled gradient descent on both the prediction error and the reaching error is capable of  
286 reproducing with high fidelity the entire history of a subject's responses to a sequence of targets (Fig 5).  
287 While we are unable to exclude more complex processes that could lead to an equally effective nonlinear  
288 inverse model of the linear BoMI map, the linearity assumption not only leads to results that agree with the  
289 experimental data but also fulfills Occam's razor criterion for simplicity.

290 We conclude with some comments on the clinical relevance of this study. Damage to the spinal cord,  
291 stroke, and other neurological disorders often cause long-lasting and devastating loss of motion and  
292 coordination, as well as weakness and altered reflexes. In most cases, some residual motor and sensory  
293 capacities remain available to the disabled survivor, and can be harnessed to provide control signals to  
294 assistive devices such as robotic systems, computers, and wheelchairs. A first challenge for the disabled

295 [36] is to learn how to interact with the assistive devices and how these respond to the user's actions.

296 A broad spectrum of sensors, such inertial measurement units (IMUs) placed on the head [37] or  
297 electroencephalography (EEG) systems [38], are available for detecting and decoding movement intentions.

298 A body machine interface (BoMI) captures residual body motions by optical [17, 39, 40], accelerometric  
299 [15, 41], or electromyographic sensors [42], and maps the sensor signals onto commands for external  
300 devices such as powered wheelchairs [15] or drones [17], or onto computer inputs. At the other end of the  
301 spectrum, brain-machine interfaces decode motor intention from neural activity recorded in motor or  
302 premotor cortical areas [19, 20, 43]. Both brain- and body-machine interfaces take advantage of the vast  
303 number of neural signals and degrees of freedom of the human body [1, 44, 45], and of the natural ability of  
304 the motor system to reorganize the control of movement [4, 9, 46, 47]. Typically these interfaces establish a  
305 map - most often linear - from the space of neural or motion signals to the lower dimensional space of  
306 control signals for the external device [41, 48]. The user's ability to operate the interface is expected to  
307 change over time; either a positive change associated with the acquisition of greater control skills, or a  
308 negative change due to the worsening of the user's medical conditions. In either case, the interface map also  
309 needs to change, to coadapt with its user. This coadaptation is a critical challenge in the development of  
310 both brain- and body-machine interfaces [21, 23]; harmonizing the interface update with the processes that  
311 guide the improvement or decay of the user's skill is of obvious importance. Understanding the dynamics  
312 of human learning through the interaction with the interface carries the promise of creating truly intelligent  
313 systems capable of compensating for the changing abilities of their users [19, 22].

## 314 **Methods**

### 315 **Computational model**

316 Inverse kinematics is a well-known and well-explored computational problem in robotics [49, 50] and  
317 human motor control [27, 51]; it refers to finding the configuration of joint angles that results in a desired  
318 position of an end effector or of the hand in the operational space [52]. Inverse kinematics problems  
319 become ill-posed [53] when there are multiple valid solutions as a consequence of the many-to-one nature  
320 of the forward kinematic map. This is the situation considered here, in which the kinematics that the  
321 subjects are controlling may be partitioned in a sequence of two maps. In a first map, the subjects control

322 the motions of their bodies by acting on a multitude of muscles and joints. In a second map, the signals  
323 triggered by these body motions determine the lower dimensional state of an external object such as a  
324 wheelchair [15], a cursor on a computer screen [16], or a drone [17]. Here we make the critical but  
325 reasonable assumption that the subjects have already acquired in a stable form the expertise needed to  
326 control the motion of their body, or at least portions of it that were unaffected by injury or disease.  
327 Therefore, they only need to acquire the second component. This is the component we focus on, limited  
328 here to a body-machine interface whose linear map  $H$  transforms, at any given trial  $n$ , an  $S$ -dimensional  
329 vector of body signals  $q$  into a  $K$ -dimensional control vector  $p$  as follows:

$$330 \quad p^{(n)} = Hq^{(n)} = \begin{bmatrix} h_{1,1} & \cdots & h_{1,S} \\ \vdots & \ddots & \vdots \\ h_{K,1} & \cdots & h_{K,S} \end{bmatrix} q^{(n)} \quad (4)$$

331 Here,  $H$  is a  $K \times S$  matrix. Since  $K < S$ , this interface map is many-to-one and there is a "null space" of inputs  
332 for each value of its output, encompassing all different patterns of body signals that result in the same  
333 control signal. This is an important characteristic of the map; earlier work has shown that subjects learn  
334 through practice to separate the null space from its orthogonal "potent space" complement [48].

335 **Learning dynamics as first order state-based model.** In a learning experiment where the goal  
336 is to reach targets in the control space, the superscript  $n$  labels the trials or successive repetitions of a single  
337 action; for instance, each trial is a reaching movement in a sequence of such movements. At the end of a  
338 trial, the learner observes an error  $e^{(n)}$ . This error drives the updating of the internal model, which we  
339 assume to be a linear map  $G^{(n)}$  transforming a goal  $u^{(n)}$  into its corresponding body vector (previously  
340 Equation (3)):

$$341 \quad q^{(n)} = G^{(n)}u^{(n)} \quad (5)$$

342 Since the forward map  $H$  is linear, the linearity of  $G$  is a sufficient but not necessary condition. More  
343 complex nonlinear structures of the inverse model would in principle be admissible. Here, we assume the  
344 simplest general form for a linear inverse model of the forward BoMI map; this assumption makes the  
345 investigation of learning dynamics tractable.

346 For the  $n$ -th reaching trial,  $u^{(n)}$  is the position of the target, and the reaching error is the  $K$ -dimensional

347 vector from the target position to the actual position of the controlled object at the end of the trial:

$$348 \quad e^{(n)} = p^{(n)} - u^{(n)}. \quad (6)$$

349 As learning reaches a steady state, participants are expected to have eliminated this error. This implies that  
350 the internal model becomes a right-inverse model of the interface map: since

$$351 \quad e^{(n)} = p^{(n)} - u^{(n)} = (HG^{(n)} - I_K) u^{(n)}, \quad (7)$$

352 then  $e^{(n)} = 0$  requires  $H G^{(n)} = I_K$ .

353 Learning is represented as a dynamical process whose state, the internal inverse model  $G^{(n)}$ , changes after  
354 the observation of each reaching error. The targets presented to the learner constitute the external input to  
355 this process. To ensure that the change in state leads to a reduction of the error, the learning process drives  
356 the state along the gradient of the quadratic error surface in the state space defined by the components of  $G$ .  
357 The gradient of the squared reaching error with respect to the components of the inverse model is

$$358 \quad \nabla_G \frac{1}{2} \|(H G^{(n)} - I_K) u^{(n)}\|^2 = H^T (H G^{(n)} - I_K) u^{(n)} u^{T(n)}, \quad (8)$$

359 which leads to the update equation

$$360 \quad G^{(n+1)} = G^{(n)} - \eta H^T (H G^{(n)} - I_K) u^{(n)} u^{T(n)}, \quad (9)$$

361 or, equivalently

$$362 \quad G^{(n+1)} = G^{(n)} - \eta H^T e^{(n)} u^{T(n)}. \quad (10)$$

363 Here,  $\eta$  is a learning rate parameter that we model as a scalar, although in principle there could be a  
364 different rate for learning every element of the forward and inverse models. We found that only two  
365 learning rates,  $\varepsilon$  for the forward model and  $\eta$  for the inverse model, sufficed to account for the observed  
366 learning behavior.

367 If the interface map  $H$  is known, the update Equation (10) provides an estimate of the right inverse of  $H$   
368 solely on the basis of control space data, without performing an explicit matrix inversion. Given the targets  
369  $u^{(n)}$ , the variables of interest are the observed reaching errors  $e^{(n)}$  and the estimated inverse model or "state  
370 of learning"  $G^{(n)}$ . As  $e^{(n)} \rightarrow 0$ ,  $G^{(n)}$  becomes stationary.



371 The gradient of the error involves the actual value of the interface map  $H$ . It is not plausible to assume that  
 372 our subjects had any initial notion of the interface map, let alone an exact representation. In a realistic  
 373 model of learning, the value of  $H$  must be replaced with an evolving estimate  $\hat{H}^{(n)}$ . In this scenario, the  
 374 current state of learning is represented in a higher dimensional space that includes the components of both  
 375  $G^{(n)}$  and  $\hat{H}^{(n)}$ . In the case of  $S=8$  body signals controlling the location of an object in  $K=2$  dimensions, the  
 376 state space for learning is  $2 \times 8 \times 2 = 32$ -dimensional. We follow a concept introduced by Jordan and  
 377 Rumelhart [14], and represent learning as the parallel development a of forward-inverse model.. The  
 378 forward model leads to a prediction of the controlled device position given the current set of body signals,  
 379 whereas the inverse model generates the body signals needed to achieve a given target position of the  
 380 device.

381 In principle, the two learning processes could take place in two separate phases: a “flailing” phase where  
 382 aimless body motions are produced and the resulting object motions are compared with their expected  
 383 motion to obtain prediction errors that drive the estimation of the forward model. This would then be  
 384 followed by a phase where the subjects reach for specific targets, and reaching errors drive the estimation  
 385 of the inverse model (see S1 Fig). This mechanism has been suggested as a possible model of motor  
 386 development in infants [54], who acquire a model of the dynamical properties of limbs by driving them  
 387 with erratic neuromuscular activities. However, this is not the case in experiments where subjects are  
 388 presented with reaching targets from the onset; in this scenario, no aimless “flailing” was observed. It is  
 389 thus more plausible to model forward and inverse learning as concurrent processes.

390 The prediction error quantifies the difference between actual and predicted positions of the controlled  
 391 object, without reference to a target. The gradient of the squared prediction error with respect to the  
 392 components of the forward model  $H$  is

$$393 \quad \nabla_{\hat{H}} \frac{1}{2} \|p^{(n)} - \hat{H}^{(n)} q^{(n)}\|^2 = - (p^{(n)} - \hat{H}^{(n)} q^{(n)}) q^{T(n)}. \quad (11)$$

394 The update equations for the coupled learning process then are

$$395 \quad \hat{H}^{(n+1)} = \hat{H}^{(n)} + \varepsilon (p^{(n)} - \hat{H}^{(n)} q^{(n)}) q^{T(n)}, \quad (12)$$

$$396 \quad G^{(n+1)} = G^{(n)} - \eta \hat{H}^{(n)T} e^{(n)} u^{T(n)}, \quad (13)$$

397 reported earlier as Equations (1) and (2). Note that Equation (12) contains a term that is quadratic in  $q$ ; this  
398 implies a quadratic dependence on the elements of  $G^{(n)}$ , since at each step  $q^{(n)}$  is derived by applying  $G^{(n)}$   
399 to the corresponding target. The update equation for the estimate of the forward model is thus not linear,  
400 and the learning process is prone to get stuck in local minima. The simplest way to avoid this is to add a  
401 small amount of noise to the body signals derived from the inverse model,

$$402 \quad q^{(n)} = G^{(n)}u^{(n)} + \xi^{(n)}, \quad (14)$$

403 where the noise  $\xi$  has the same dimension  $S$  as  $q$ , and each component of  $\xi$  is independently drawn from a  
404 Gaussian distribution  $\mathcal{N}(0, \sigma^2)$  at each trial.

405 Two important parameters of the combined learning model of Equations (12) and (13) are the learning rates  
406 for the forward ( $\epsilon$ ) and the inverse ( $\eta$ ) models. In the case of eight body signals mapped into a two-  
407 dimensional control space, these learning rates apply to the evolution of 16 elements each; their most  
408 general form would be a 2x8 matrix for  $\epsilon$  and an 8x2 matrix for  $\eta$ . Here, for simplicity and to avoid  
409 overfitting, we assume both learning rates to be scalar. A similar assumption is made for the noise  
410 amplitude  $\sigma$ , a somewhat less critical parameter whose sole purpose is to add sufficient noise to the  
411 learning algorithm so as to avoid getting trapped in local minima.

## 412 **Validation of the model with experimental data**

413 To validate the outcomes of the model we recruited six unimpaired subjects (age range 21-40 years old, 3  
414 males and 3 females) in the preliminary study. All of them signed an informed consent approved by  
415 Northwestern University Institutional Review Board.

416 The subjects practiced the execution of reaching movements via an interface (Fig 6) that mapped an eight-  
417 dimensional signal space associated with upper body motions to the two-dimensional task space of a  
418 computer cursor. An array of four video cameras (V100, Naturalpoint Inc., OR, USA) was used to track  
419 active infrared light sources attached to the subject's upper-body garments (two for each side of the body,  
420 one on the shoulder and one on the upper arm, as shown in Fig 6). Each camera pointed at a single marker,  
421 providing two signals defining the coordinates of the marker in the camera's frame. Collectively, the four  
422 sensors provided an eight-dimensional body vector  $q$  that was transformed into a command vector  $p$  for  
423 controlling the position of a cursor on a computer screen,  $p = Hq$ .

**Fig 6. Experimental setup of the Body Machine Interface.** The subject sits on a chair in front of the computer. Active optical markers were placed on shoulders and arms; their positions were recorded by infrared cameras.

424

425 In order to design the matrix  $H$  for each subject, we used a standard linear dimensionality reduction  
426 method, principal component analysis (PCA) [55] to set up the dimensionality reduction implicit in the  $q$  to  
427  $p$  map. PCA is based on the decorrelation of the input signals through the diagonalization of their  
428 covariance matrix; dimensionality reduction is obtained by keeping only the eigenvectors corresponding to  
429 the  $K=2$  largest eigenvalues. PCA provided us with a computationally straightforward method for  
430 identifying those directions that captured the largest extent (i.e. the largest variance) of body motions  
431 within the space of sensor signals for each subject.

432 The interface map  $H$  from the input space of body signals to the output task space was constructed in three  
433 steps:

434 1) Calibration – Subjects were asked to freely explore their range of shoulders and upper arms motion in all  
435 possible directions for about 60 seconds. This stage results in an aimless free dance, during which subjects  
436 visited a large portion of their available range of motion; their movements were limited only by the type  
437 and degree of impairment. The “calibration” data set  $Q_{CAL}$  was organized as an  $S \times M$  matrix, where the  
438 number  $S$  of rows is the dimensionality of the space of sensor signals (here,  $S=8$ ) and the number  $M$  of  
439 columns is the total number of samples (here  $M=5000$ , collected over about 66 seconds at 75 samples per  
440 second).

441 2) PCA – The principal components of the data set  $Q_{CAL}$  were extracted using PCA. The  $S$  eigenvectors of  
442 the covariance matrix of the sensor signals were ordered according to the magnitude of their corresponding  
443 eigenvalues, from largest to smallest. The eigenvalues represent the variance of the data along the  
444 eigenvector directions; those directions with high signal excursion correspond to larger eigenvalues. We  
445 considered those high-variance movement directions to be the user’s “best controlled” combinations, and  
446 used the  $K$  leading eigenvectors as rows to construct the  $K \times S$  matrix  $H$  (Equation (4)). In our case the  
447 interface map  $H$  was a  $2 \times 8$  matrix; the two first PCs accounted for  $73 \pm 5\%$  of the variance of the calibration  
448 dataset across subjects.

449 3) Training – After calibration, participants went through a two-hours training session. The training session

450 consisted of 324 reaching movements from the center of the screen to targets located 5 cm away from the  
451 center in 6 directions  $60^\circ$  apart. Although the order of target presentation was randomized, a given target  
452 was not presented until the subject had reached all other targets. The subjects had no visual feedback about  
453 the cursor position for the first second following movement onset. The cursor then became visible, and the  
454 subjects could use visual feedback to correct for the reaching error if the cursor was not on the target.

## 455 **Data analysis**

456 **Estimation of the learning dynamics.** To investigate the learning dynamics, we focused on the  
457 temporal evolution of two scalar variables in task space: the reaching error (RE) and the inverse model  
458 error (IME). These two variables were computed both from the data for healthy volunteers and from the  
459 synthetic data generated by simulating the proposed model for the learning process.

460 The reaching error RE was computed as the norm of the difference between the actual cursor position at the  
461 end of the reaching movement and the target position. For the experimental data, we considered as an  
462 estimate of the reaching error the distance between target and cursor at the end of the blind phase of the  
463 trial, when the subjects moved relying only on their inverse internal model in the absence of visual  
464 feedback of the cursor motion. As the cursor reappeared, the subjects performed a corrective movement  
465 bringing the cursor on the target. The inverse model error IME was computed as the norm of the difference  
466 between the identity matrix  $I_K$  and the product  $H G^{(n)}$  between the interface map and the estimate of the  
467 inverse map at the end of each trial.

468 The lower dimensionality of the output space for the interface map  $H$  causes the problem of finding the  
469 inverse map to be ill-posed; the surface defined by the squared reaching error in the state space spanned by  
470 the components of  $G$  does not exhibit a single minimum but a flat extended “valley” corresponding to all  
471 possible inverses of the interface map  $H$ . To circumvent this ambiguity and to monitor whether subjects  
472 converged towards a stable inverse transformation, we estimated the inverse model matrix  $G^{(n)}$  from the  
473 subjects’ performance.

474 A typical experimental data set consisted of temporal sequences of reaching movements. At each trial  $n$  we  
475 considered a movement set, a sequence of  $r$  trials that included the  $n$ -th trial and the  $(r-1)$  trials that  
476 preceded it. Here we used  $r=12$ , so that on average each movement set included two trials towards each of

477 the six different targets. The body and target vectors for the  $n$ -th movement set were collected in the arrays

$$478 \quad Q^{(n)} = [q^{(n-r+1)}, \dots, q^{(n)}] \text{ and } U^{(n)} = [u^{(n-r+1)}, \dots, u^{(n)}]. \quad (15)$$

479 The matrix  $G^{(n)}$  then was obtained from a least-squares estimation based on Equation (3):

$$480 \quad G^{(n)} = Q^{(n)} U^{(n)T} (U^{(n)} U^{(n)T})^{-1}. \quad (16)$$

481 The history of reaching errors for the  $r$  trials in the movement set that ended with trial  $n$  was computed as

$$482 \quad E^{(n)} = H Q^{(n)} - U^{(n)}. \quad (17)$$

483 A scalar reaching error (RE) was then calculated by taking the spectral norm  $\|E^{(n)}\|$  of the  $K \times r$  matrix in

484 Equation (17). Similarly, we calculated the inverse model error (IME) as the spectral norm  $\|H G^{(n)} - I_K\|$ .

485 The IME is expected to approach 0 as learning converges and  $G^{(n)}$  approaches a right inverse of  $H$ . The

486 convergence toward a stable representation of the inverse map was assessed by computing the percentage

487 difference in norm among consecutive estimations of  $G^{(n)}$ ,

$$488 \quad \Delta G^{(n)} = \frac{\|G^{(n)} - G^{(n-1)}\|}{\|G^{(n-1)}\|}. \quad (18)$$

489 We defined two additional errors to quantify whether each subject was also forming a forward map  $\hat{H}$  that

490 converged to the interface map  $H$ . We defined the forward model error (FME) as

$$491 \quad FME^{(n)} = \frac{\|H - \hat{H}^{(n)}\|}{\|H\|} \quad (19)$$

492 The current estimate  $\hat{H}^{(n)}$  affects the prediction error, computed in task space as the difference between the

493 actual position of the cursor and the one estimated with the current estimate of the forward model. The L2

494 norm of this difference defines

$$495 \quad PE^{(n)} = \|P^{(n)} - \hat{H}^{(n)} Q^{(n)}\|, \quad (20)$$

496 with  $P^{(n)} = H Q^{(n)}$ .

497 No moving window was used to compute these two errors because both PE and FME could be extracted

498 from the simulated data at each trial.

499 **Model parameters.** For each subject recruited for the study, we constructed a model that used the

500 same interface map  $H$  as used by the subject; the model was then exposed to the same target sequence. To  
501 set the individual learning rate  $\eta$  for the learning of the inverse map in Equations (2) and (13), we fitted the  
502 experimentally observed decay of the norm RE of the reaching errors for each subject to an exponential of  
503 the form

$$504 \quad RE^{(n)} = ae^{-(\lambda_{RE})n} + c, \quad (21)$$

505 to obtain a value of  $\lambda_{RE}$  for each subject. We then set  $\eta = \lambda_{RE}$  in the corresponding subject-specific model.

506 To set values for the parameters  $\varepsilon$  and  $\sigma$  we adopted a minimum search approach to minimizing a cost  
507 function based on the forward model error (FME), as those two parameters mostly influence the evolution  
508 of the estimation  $\hat{H}$  of the forward model. The cost function  $C$  was defined as

$$509 \quad C = \sum_{n=1}^N \frac{\|H - \hat{H}^{(n)}\|}{\|H\|}, \quad (22)$$

510 where  $N$  is the total number of trials.

511 **Comparison between simulated and real data.** To estimate the similarity between the real and  
512 model data we used the correlation coefficient  $R^2$ . By definition the  $R^2$  evaluates similarity between the  
513 shapes of the compared curves and also provides additional information regarding the amplitude. This  
514 metric was applied to the norm RE of the reaching error, the norm IME of the inverse model error, the body  
515 coordinates  $q$ , and the cursor coordinates  $p$ . For each of these quantities, assume that the measured values  
516 are  $\{y^{(n)}\}$ ,  $1 \leq n \leq N$ , where  $N$  is the total number of trials. The model gives a prediction or estimation  
517  $\{\hat{y}^{(n)}\}$ ,  $1 \leq n \leq N$  for each of these values, with residuals  $e^{(n)} = y^{(n)} - \hat{y}^{(n)}$ ,  $1 \leq n \leq N$ . The mean of the  
518 observed data is given by  $\bar{y} = (1/N)\sum_{n=1}^N y^{(n)}$ . The total sum of squares

$$519 \quad SS_{tot} = \sum_{n=1}^N (y^{(n)} - \bar{y})^2 \quad (23)$$

520 is proportional to the variance of the experimentally observed values. The sum of squares of the residuals is

$$521 \quad SS_{res} = \sum_{n=1}^N (y^{(n)} - \hat{y}^{(n)})^2 = \sum_{n=1}^N (e^{(n)})^2 \quad (24)$$

522 The most general definition of  $R^2$ , as used here, follows from the ratio between these two sums of squares

$$523 \quad R^2 \equiv 1 - \frac{SS_{res}}{SS_{tot}}$$

524

525 **Acknowledgment**

526 The authors are grateful to prof. Marco Baglietto for the precious discussion about the modelistic part of

527 the work.

## 528 **References**

- 529 1. Bernstein N. The coordination and regulation of movement. Oxford: Pergamon Press; 1967.
- 530 2. Latash ML. The bliss (not the problem) of motor abundance (not redundancy). *Experimental brain*
- 531 *research*. 2012;217(1):1-5.
- 532 3. Todorov E, Jordan MI. Optimal feedback control as a theory of motor coordination. *Nature*
- 533 *Neuroscience*. 2002;5(11):1226-35. doi: 10.1038/n963. PubMed PMID: WOS:000178884600027.
- 534 4. Shadmehr R, Mussa-Ivaldi FA. Adaptive representation of dynamics during learning of a motor
- 535 *task*. *Journal of Neuroscience*. 1994;14(5):3208-24.
- 536 5. Conditt MA, Gandolfo F, Mussa-Ivaldi FA. The motor system does not learn the dynamics of the
- 537 *arm by rote memorization of past experience*. *J Neurophysiol*. 1997;78(1):554-60.
- 538 6. Kawato M. Internal models for motor control and trajectory planning. *Current opinion in*
- 539 *neurobiology*. 1999;9(6):718-27.
- 540 7. Krakauer J, Ghilardi M, Ghez C. Independent learning of internal models for kinematic and
- 541 *dynamic control of reaching*. *Nature Neuroscience*. 1999;2:1026-31.
- 542 8. Wolpert D, Miall R, Kawato M. Internal models in the cerebellum. *Trends in Cognitive Sciences*.
- 543 1998;2:338-47.
- 544 9. Shadmehr R, Mussa-Ivaldi FA. *Biological Learning and Control. How the Brain Builds*
- 545 *representations, Predicts Events, and Makes Decisions*. Cambridge, MA: MIT Press; 2012.
- 546 10. Donchin O, Francis JT, Shadmehr R. Quantifying generalization from trial-by-trial behavior of
- 547 *adaptive systems that learn with basis functions: theory and experiments in human motor control*. *Journal*
- 548 *of Neuroscience*. 2003;23(27):9032.
- 549 11. Krakauer JW, Mazzoni P. Human sensorimotor learning: adaptation, skill, and beyond. *Current*
- 550 *opinion in neurobiology*. 2011;21(4):636-44.
- 551 12. Taylor JA, Ivry RB. Flexible cognitive strategies during motor learning. *PLoS Comput Biol*.
- 552 2011;7(3):e1001096-e.
- 553 13. Gonzalez Castro LN, Monsen CB, Smith MA. The binding of learning to action in motor
- 554 *adaptation*. *PLoS Comput Biol*. 2011;7(6):e1002052.
- 555 14. Jordan MI, Rumelhart DE. Forward models: Supervised learning with a distal teacher. *Cognitive*
- 556 *Sci*. 1992;16(3):307-54.
- 557 15. Thorp EB, Abdollahi F, Chen D, Farshchiansadegh A, Lee M-H, Pedersen J, et al. Upper Body-
- 558 *Based Power Wheelchair Control Interface for Individuals with Tetraplegia*. *IEEE Transactions on Neural*
- 559 *Systems and Rehabilitation Engineering*. 2015. doi: 10.1109/TNSRE.2015.2439240.
- 560 16. Pierella C, Abdollahi F, Thorp E, Farshchiansadegh A, Pedersen J, Seáñez-González I, et al.
- 561 *Learning new movements after paralysis: Results from a home-based study*. *Scientific reports*.
- 562 2017;7(1):4779.
- 563 17. Miehlsbradt J, Cherpillod A, Mintchev S, Coscia M, Artoni F, Floreano D, et al. Data-driven body-
- 564 *machine interface for the accurate control of drones*. *Proc Natl Acad Sci U S A*. 2018;115(31):7913-8. doi:
- 565 10.1073/pnas.1718648115. PubMed PMID: 30012599.
- 566 18. Schwartz AB, Taylor DM, Tillery SIH. Extraction algorithms for cortical control of arm
- 567 *prosthetics*. *Current Opinion in Neurobiology*. 2001;11(6):701-7. doi: Doi 10.1016/S0959-4388(01)00272-
- 568 0. PubMed PMID: WOS:000172771900009.
- 569 19. Carmena JM, Lebedev MA, Crist RE, O'Doherty JE, Santucci DM, Dimitrov DF, et al. Learning
- 570 *to control a brain-machine interface for reaching and grasping by primates*. *Plos Biol*. 2003;1(2):193-208.
- 571 doi: ARTN e42
  
- 572 10.1371/journal.pbio.0000042. PubMed PMID: WOS:000188835200011.
- 573 20. Hochberg LR, Serruya MD, Friehs GM, Mukand JA, Saleh M, Caplan AH, et al. Neuronal
- 574 *ensemble control of prosthetic devices by a human with tetraplegia*. *Nature*. 2006;442(7099):164-71. doi:
- 575 10.1038/nature04970. PubMed PMID: WOS:000238979700039.
- 576 21. Dangi S, Orsborn AL, Moorman HG, Carmena JM. Design and analysis of closed-loop decoder
- 577 *adaptation algorithms for brain-machine interfaces*. *Neural Comput*. 2013;25(7):1693-731. doi:
- 578 10.1162/NECO\_a\_00460. PubMed PMID: 23607558.
- 579 22. Taylor DM, Tillery SI, Schwartz AB. Direct cortical control of 3D neuroprosthetic devices.
- 580 *Science*. 2002;296(5574):1829-32. doi: 10.1126/science.1070291. PubMed PMID: 12052948.



- 581 23. Danziger Z, Fishbach A, Mussa-Ivaldi FA. Learning algorithms for human-machine interfaces.  
582 IEEE Trans Biomed Eng. 2009;56(5):1502-11. doi: 10.1109/TBME.2009.2013822. PubMed PMID:  
583 19203886; PubMed Central PMCID: PMC3286659.
- 584 24. Emken JL, Reinkensmeyer DJ. Robot-enhanced motor learning: Accelerating internal model  
585 formation during locomotion by transient dynamic amplification. Ieee Transactions on Neural Systems and  
586 Rehabilitation Engineering. 2005;13(1):33-9. doi: 10.1109/Tnsre.2004.843173. PubMed PMID:  
587 WOS:000227747000005.
- 588 25. Shadmehr R, Wise SP. The computational neurobiology of reaching and pointing: a foundation for  
589 motor learning: MIT press; 2005.
- 590 26. Hoff B, Arbib MA. Models of Trajectory Formation and Temporal Interaction of Reach and  
591 Grasp. J Mot Behav. 1993;25(3):175-92. doi: 10.1080/00222895.1993.9942048. PubMed PMID:  
592 12581988.
- 593 27. Atkeson C. Learning arm kinematics and dynamics. Annual Review of Neuroscience.  
594 1989;12:157-83.
- 595 28. Kawato M. Adaptation and learning in control of voluntary movement by the central nervous  
596 system. Advanced Robotics. 1988;3(3):229-49.
- 597 29. Shadmehr R, Mussa-Ivaldi FA. Adaptive representation of dynamics during learning of a motor  
598 task. J Neurosci. 1994;14(5 Pt 2):3208-24. PubMed PMID: 8182467.
- 599 30. Jordan MI, Rumelhart DE. Forward Models - Supervised Learning with a Distal Teacher.  
600 Cognitive Sci. 1992;16(3):307-54. doi: DOI 10.1207/s15516709cog1603\_1. PubMed PMID:  
601 WOS:A1992JR20400001.
- 602 31. Wolpert DM, Ghahramani Z, Jordan MI. An Internal Model for Sensorimotor Integration. Science.  
603 1995;269(5232):1880-2. doi: DOI 10.1126/science.7569931. PubMed PMID: WOS:A1995RX19400041.
- 604 32. Miall RC, Wolpert DM. Forward models for physiological motor control. Neural Networks.  
605 1996;9(8):1265-79. doi: Doi 10.1016/S0893-6080(96)00035-4. PubMed PMID:  
606 WOS:A1996VW31700002.
- 607 33. Bhushan N, Shadmehr R. Computational nature of human adaptive control during learning of  
608 reaching movements in force fields. Biological cybernetics. 1999;81(1):39-60.
- 609 34. Diedrichsen J, White O, Newman D, Lally N. Use-dependent and error-based learning of motor  
610 behaviors. The Journal of neuroscience. 2010;30(15):5159-66.
- 611 35. Herzfeld DJ, Vaswani PA, Marko MK, Shadmehr R. A memory of errors in sensorimotor  
612 learning. Science. 2014;345(6202):1349-53.
- 613 36. Edwards K, McCluskey A. A survey of adult power wheelchair and scooter users. Disability and  
614 Rehabilitation: Assistive Technology. 2010;5(6):411-9.
- 615 37. Mandel C, Röfer T, Frese U, editors. Applying a 3dof orientation tracker as a human-robot  
616 interface for autonomous wheelchairs. Rehabilitation Robotics, 2007 ICORR 2007 IEEE 10th International  
617 Conference on; 2007: IEEE.
- 618 38. Carlson T, Demiris Y. Collaborative control for a robotic wheelchair: evaluation of performance,  
619 attention, and workload. Systems, Man, and Cybernetics, Part B: Cybernetics, IEEE Transactions on.  
620 2012;42(3):876-88.
- 621 39. Casadio M, Pressman A, Acosta S, Danziger Z, Fishbach A, Mussa-Ivaldi FA. Body machine  
622 interface: remapping motor skills after spinal cord injury. Proceedings of the 12th IEEE International  
623 Conference on Rehabilitation Robotics Rehab Week Zurich, ETH Zurich Science City, Switzerland, June  
624 29- July 1. 2011.
- 625 40. Casadio M, Pressman A, Fishbach A, Danziger Z, Acosta S, Chen D, et al. Functional  
626 reorganization of upper-body movement after spinal cord injury. Experimental Brain Research.  
627 2010;207:233-47.
- 628 41. Farshchiansadegh A, Abdollahi F, Chen D, Lee M-H, Pedersen J, Pierella C, et al., editors. A body  
629 machine interface based on inertial sensors. Engineering in Medicine and Biology Society (EMBC), 2014  
630 36th Annual International Conference of the IEEE; 2014: IEEE.
- 631 42. Pierella C, Sciacchitano A, Farshchiansadegh A, Casadio M, Mussa-Ivaldi S, editors. Linear vs  
632 Non-Linear Mapping in a Body Machine Interface Based on Electromyographic Signals. 2018 7th IEEE  
633 International Conference on Biomedical Robotics and Biomechatronics (Biorob); 2018: IEEE.
- 634 43. Wolpaw JR, Birbaumer N, McFarland DJ, Pfurtscheller G, Vaughan TM. Brain-computer  
635 interfaces for communication and control. Clin Neurophysiol. 2002;113(6):767-91. PubMed PMID:  
636 12048038.

- 637 44. Latash M. There is no motor redundancy in human movements. There is motor abundance. *Motor*  
638 *Control*. 2000;4(3):259-60. PubMed PMID: 10970151.
- 639 45. Mussa Ivaldi FA, Morasso P, Zaccaria R. Kinematic networks. A distributed model for  
640 representing and regularizing motor redundancy. *Biol Cybern*. 1988;60(1):1-16. PubMed PMID: 3214648.
- 641 46. Radhakrishnan SM, Baker SN, Jackson A. Learning a Novel Myoelectric-Controlled Interface  
642 Task. *J Neurophysiol*. 2008;100:2397-408.
- 643 47. Scheidt RA, Dingwell JB, Mussa-Ivaldi FA. Learning to move amid uncertainty. *J Neurophysiol*.  
644 2001;86:971-85.
- 645 48. Mosier KM, Scheidt RA, Acosta S, Mussa-Ivaldi FA. Remapping Hand Movements in a Novel  
646 Geometrical Environment. *J Neurophysiol*. 2005;94:4362-72.
- 647 49. Baker DR, Wampler CW. On the inverse kinematics of redundant manipulators. *International*  
648 *Journal of Robotics Research*. 1988;7:3-21.
- 649 50. Brady M, Hollerbach J, Johnson T, Lozano-Perez T, Mason M. *Robot motion: Planning and*  
650 *control*. Cambridge, MA: MIT Press; 1982.
- 651 51. Wolpert DM, Ghahramani Z, Jordan MI. Are arm trajectories planned in kinematic or dynamic  
652 coordinates? An adaptation study. *Experiental Brain Research*. 1995;103:460-70.
- 653 52. Khatib O. A unified approach for motion and force control of robot manipulators: The operational  
654 space formulation. *IEEE Journal on Robotics and Automation*. 1987;3(1):43-53.
- 655 53. Tikhonov AN, Arsenin VY. *Solutions of Ill-posed Problems*. Washington, DC: W. H. Winston;  
656 1977.
- 657 54. Clark JE, Metcalfe JS. The mountain of motor development: A metaphor. *Motor development:*  
658 *Research and reviews*. 2002;2(163-190).
- 659 55. Jolliffe IT. *Principal Component Analysis* New York, NY: Springer; 2002.

## 660 **Supporting information**

**S1 Fig. Modeling human learning with sequential learning of forward and inverse models.** (a) Temporal evolution of the norm RE of the reaching error as a function of trial number  $n$  calculated from the data of six subjects (black) and from the respective models (blue). (b) Temporal evolution of the norm IME of the inverse model error, the difference between the identity matrix  $I_K$  and the product of the interface map  $H$  and the inverse model  $G^{(n)}$ , estimated from the experimental data (black) and from the model simulations (blue). Both metrics were calculated over a moving window including 12 consecutive trials; the window was shifted forward by one trial at each iteration.

661

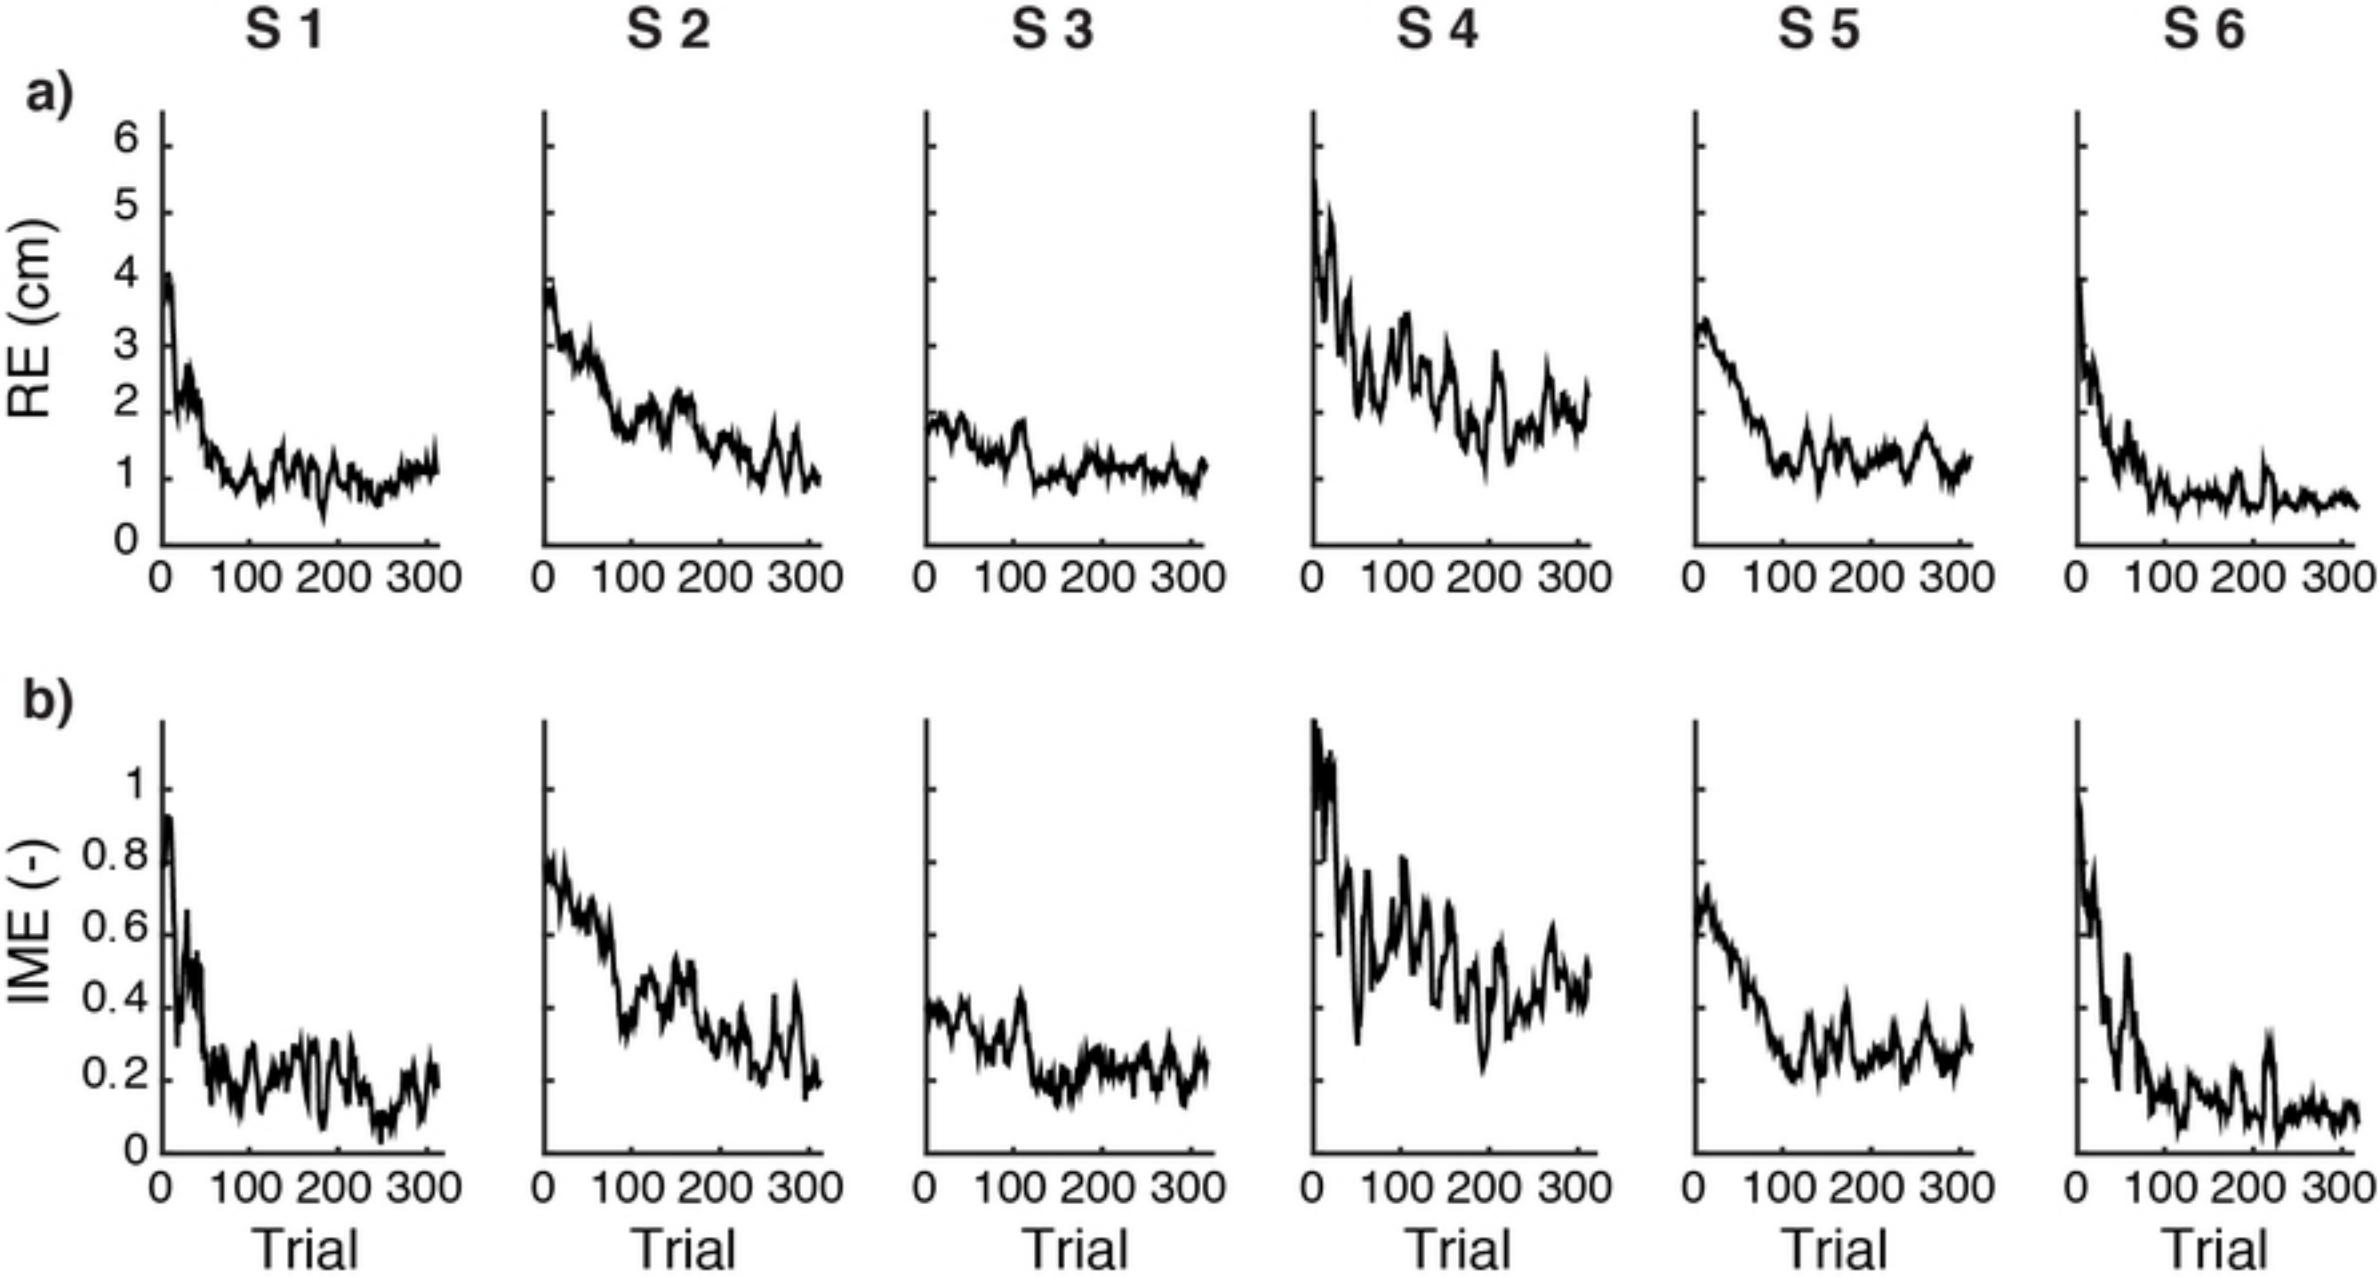

Figure

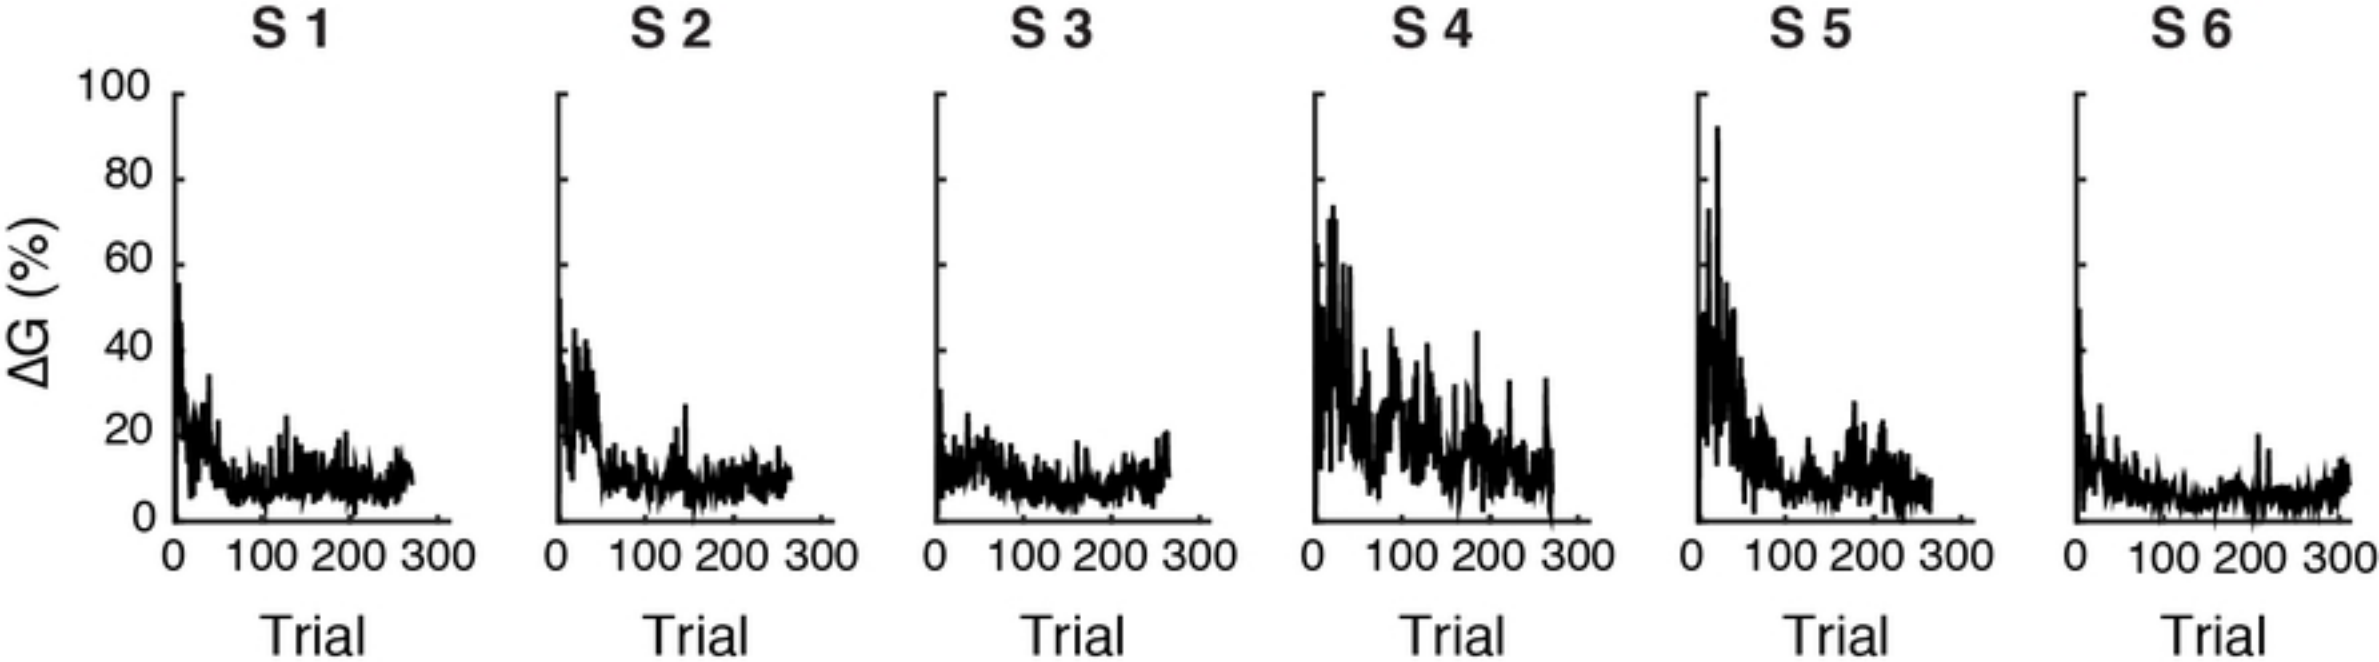

Figure

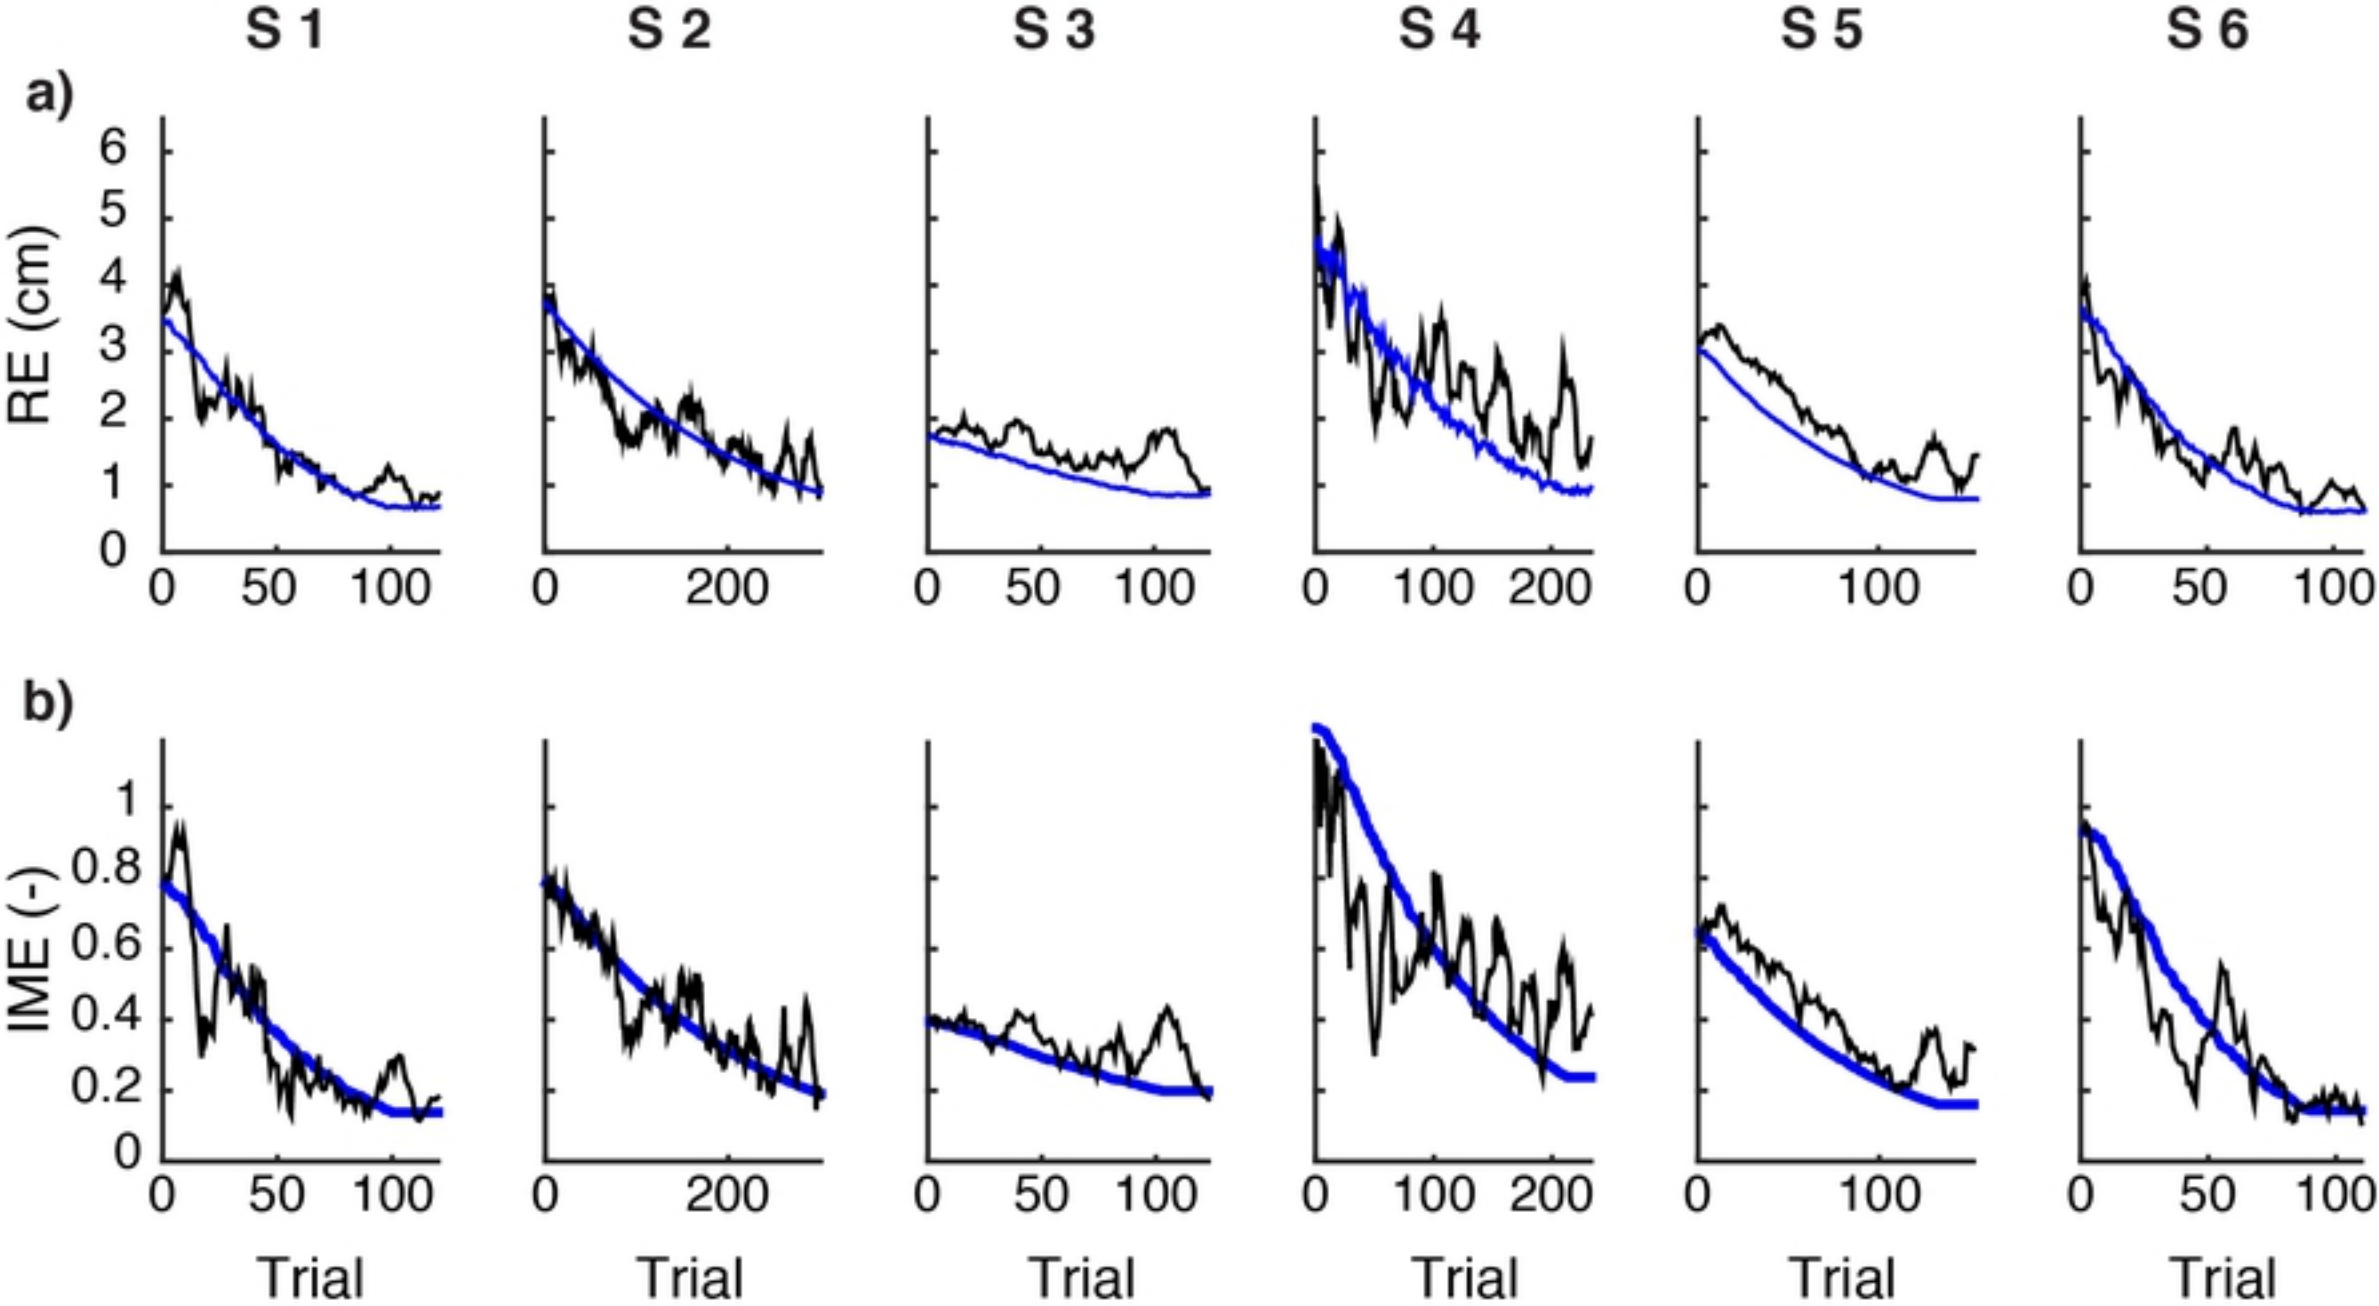

Figure

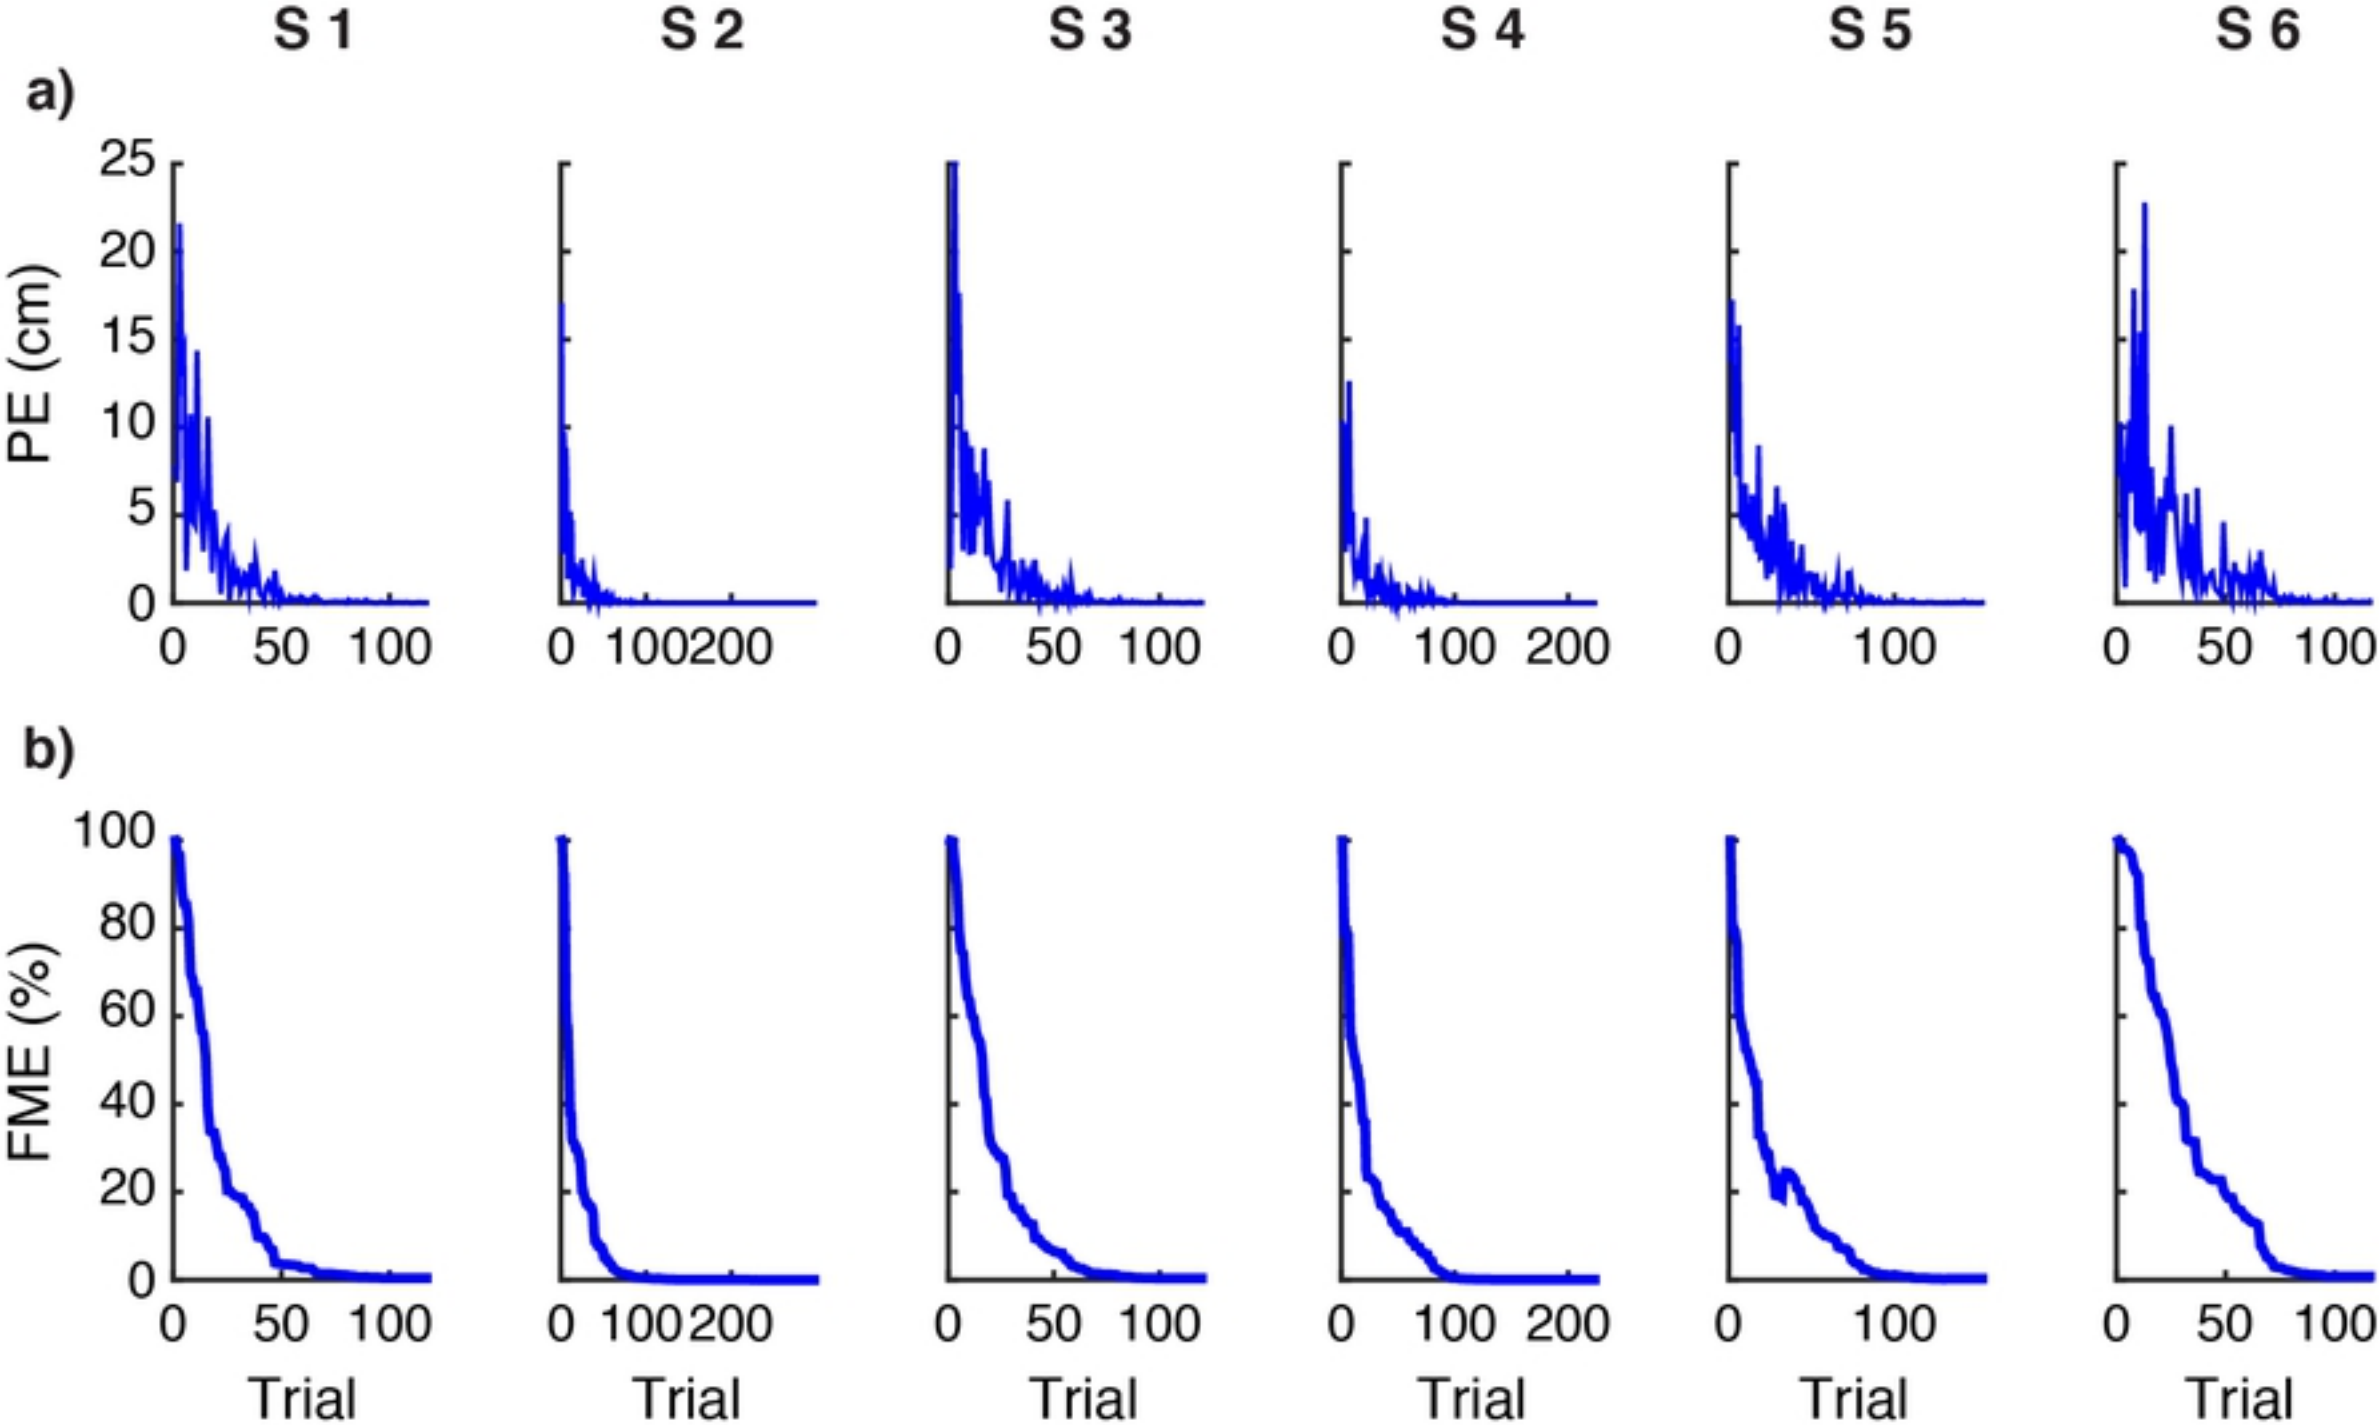

Figure

## Body space

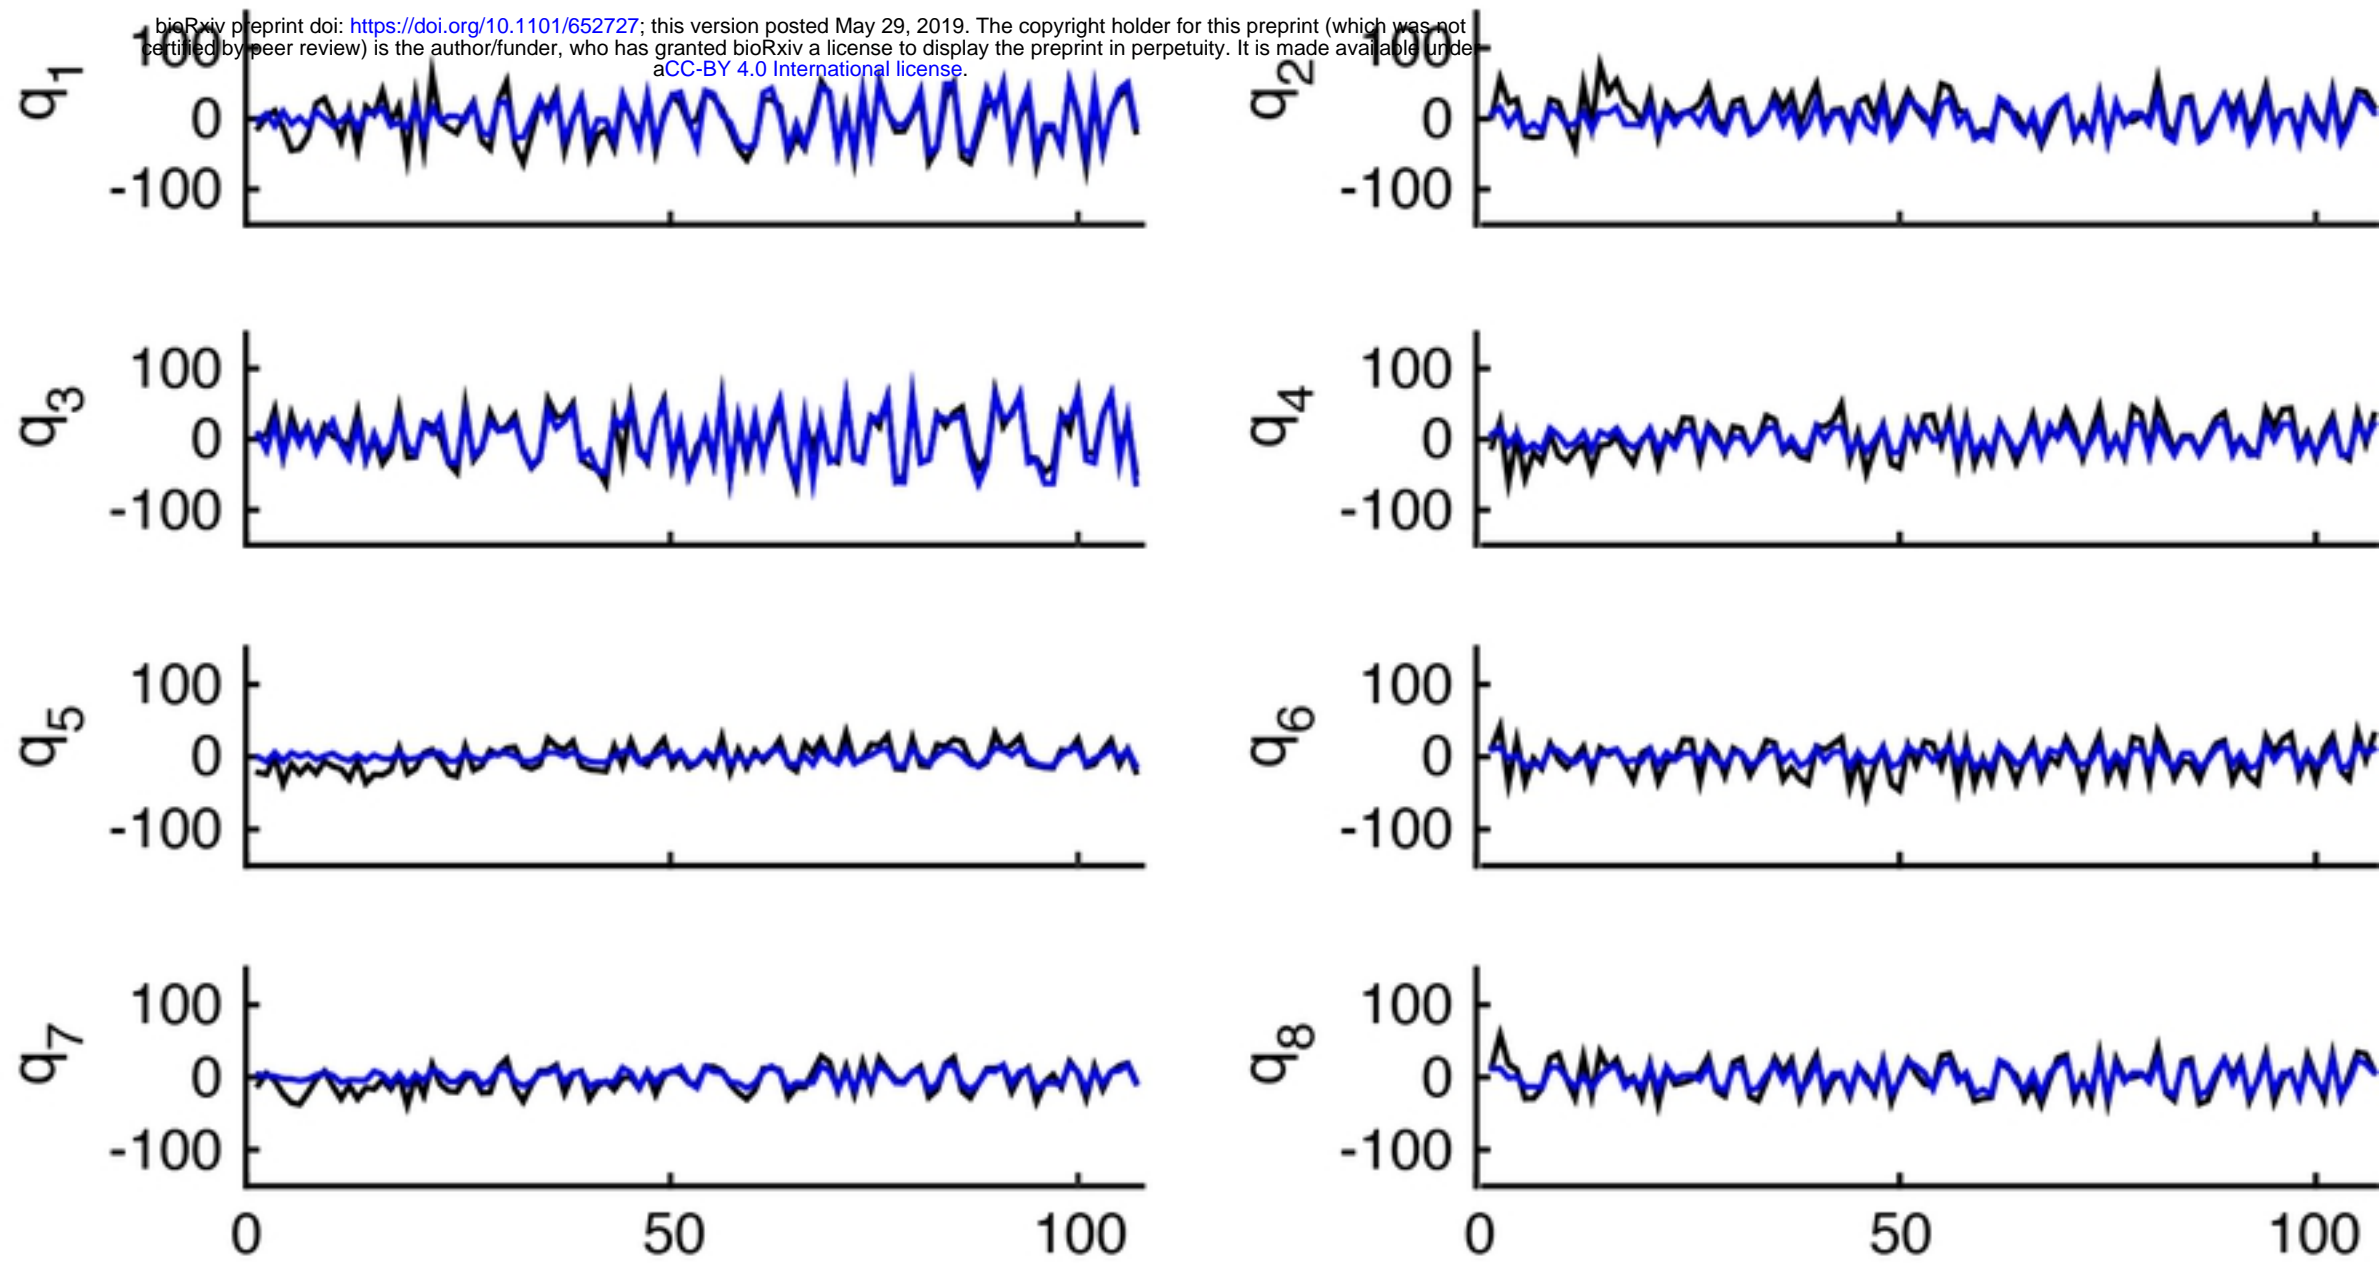

## Cursor space

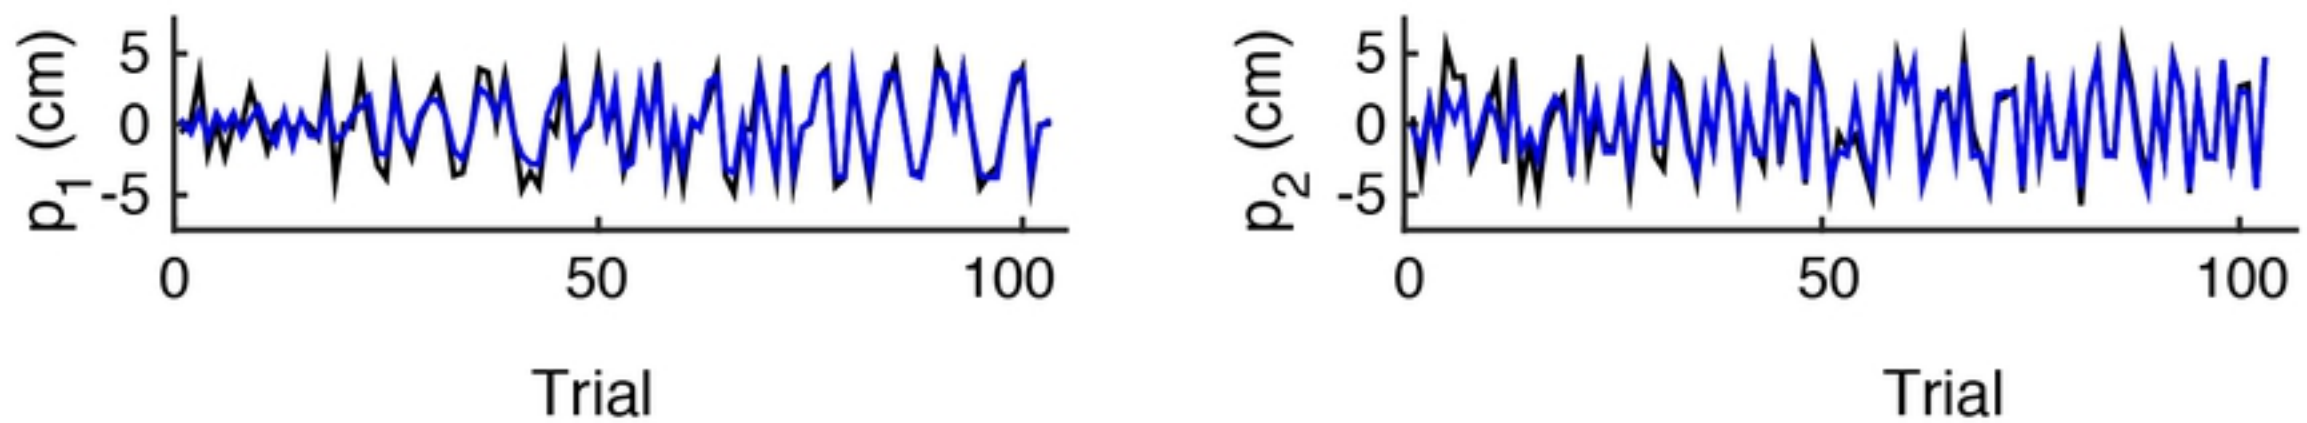

Figure

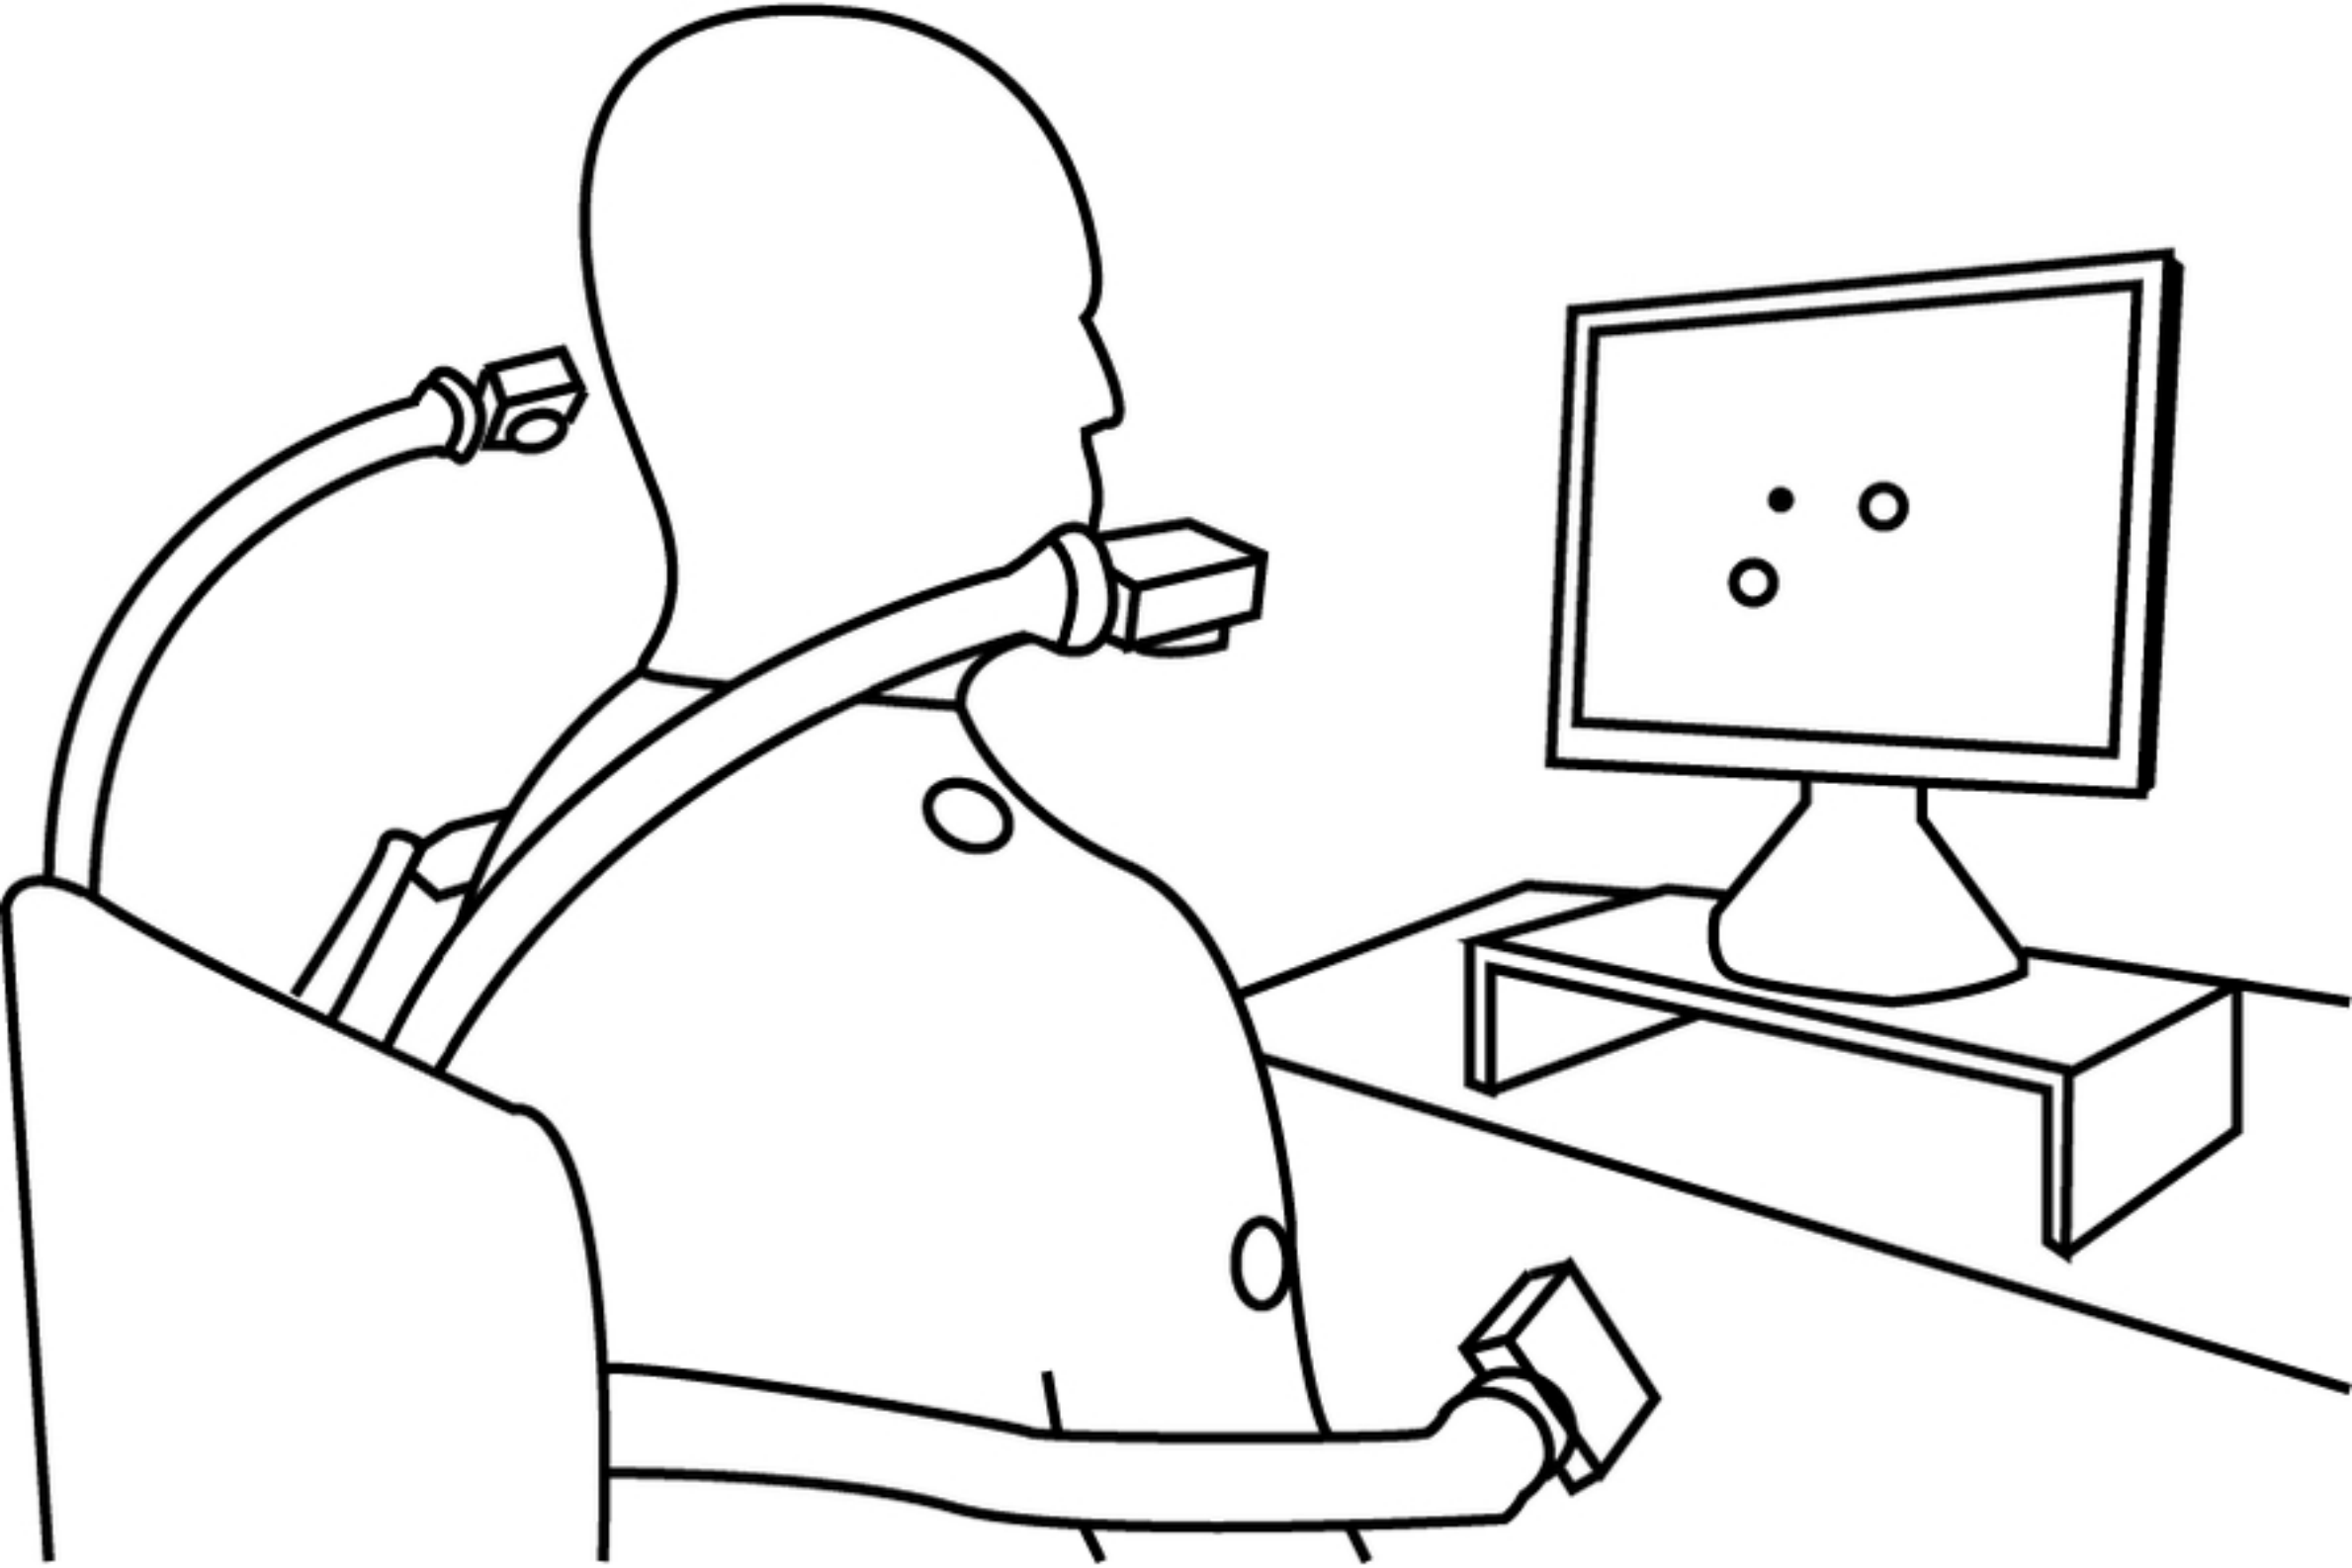

Figure
